1 **TFAP2 paralogs pioneer chromatin access for MITF and directly**  
2 **inhibit genes associated with cell migration**

3

4 Colin Kenny<sup>1</sup>, Ramile Dilshat<sup>2</sup>, Hannah Seberg<sup>1+</sup>, Eric Van Otterloo<sup>1\*</sup>, Gregory  
5 Bonde<sup>1</sup>, Annika Helverson<sup>1</sup>, Eiríkur Steingrímsson<sup>2</sup>, Robert A. Cornell<sup>1, #</sup>

6 1. Department of Anatomy and Cell Biology, College of Medicine, University of  
7 Iowa, Iowa City, Iowa

8 2. Department of Biochemistry and Molecular Biology, BioMedical Center, Faculty of  
9 Medicine, University of Iceland, Sturlugata 8, 101 Reykjavik, Iceland

10

11

12 + Current address: University of Manchester

13 \* Current address: Iowa Institute for Oral Health Research, Department of Anatomy  
14 and Cell Biology, Department of Periodontics, College of Dentistry, University of  
15 Iowa, Iowa City, Iowa

16 #Corresponding author:

17 [Robert-cornell@uiowa.edu](mailto:Robert-cornell@uiowa.edu), 319-335-8908

18 Conflict of interest statement: CK, RD, HS, EVO, GB, AH, ES and RAC declare no  
19 conflicts of interest.

20 Key words: MITF, TFAP2A, TFAP2C, chromatin, nucleosome, pioneer factor,  
21 transcriptional activation, repression.

22

## 23 **Abstract**

24 Transcription factors in the Activating-enhancer-binding Protein 2 (TFAP2) family  
25 redundantly regulate gene expression in melanocytes and melanoma. Previous  
26 ChIP-seq experiments indicate that TFAP2A and Microphthalmia-associated  
27 Transcription Factor (MITF), a master regulator in these cell types, co-activate  
28 enhancers of genes promoting pigmentation. Evidence that TFAP2 paralogs can  
29 serve as pioneer factors supports the possibility that TFAP2 facilitates MITF binding  
30 at co-bound enhancers, although this model has not been tested. In addition, while  
31 MITF and TFAP2 paralogs both appear to repress genes that promote invasion,  
32 whether they do so by co-repressing enhancers is unknown. To address these  
33 questions we evaluated gene expression, chromatin accessibility, TFAP2A and MITF  
34 binding, and chromatin marks characteristic of active enhancers in SK-MEL-28  
35 melanoma cells that were wild-type or deleted of the two *TFAP2* paralogs with  
36 highest expression, *TFAP2A* and *TFAP2C* (i.e., *TFAP2*-KO cells). Integrated  
37 analyses revealed distinct subsets of enhancers bound by TFAP2A in WT cells that  
38 are inactivated and activated, respectively, in *TFAP2*-KO cells. At enhancers bound  
39 by both MITF and TFAP2A, MITF is generally lost in *TFAP2A/TFAP2C* double  
40 mutants, but not vice versa, implying TFAP2 pioneers chromatin access for MITF.  
41 There is a strong correlation between the sets of genes inhibited by MITF and  
42 TFAP2, although we did not find evidence that TFAP2 and MITF inhibit enhancers  
43 cooperatively. The findings imply that MITF and TFAP2 paralogs cooperatively affect  
44 the melanoma phenotype.

45

## 46 **Introduction**

47 Gene expression in developing melanocytes and melanoma, a cancer derived from  
48 the melanocyte lineage, is regulated by transcription factors including  
49 Microphthalmia-associated transcription factor (MITF) and members of the SOXE,  
50 PAX and TFAP2 families (Atchison, 2014; Betancur et al., 2010; Eckert et al., 2005;  
51 Goding, 2000; Hartman and Czyz, 2015; Hoek et al., 2008b; Mollaaghababa and  
52 Pavan, 2003; Seberg et al., 2017a; Strub et al., 2011; Van Otterloo et al., 2010; Van  
53 Otterloo et al., 2012). MITF is required for differentiation of melanocytes during  
54 development, and its activity is regulated at both the transcriptional and post-

55 translational levels (Rambow et al., 2019). In melanoma cells, high levels of MITF  
56 activity promote cell proliferation and pigmentation, while lower levels promote an  
57 invasive phenotype (Carreira et al., 2006; Rambow et al., 2019). Mass spectroscopy  
58 revealed that MITF interacts with components of both the PBAF chromatin  
59 remodeling complex, including BRG1 and CDH7, and the NURF remodeling  
60 complex, including RBBP4 (de la Serna et al., 2006; Laurette et al., 2015).  
61 Furthermore, chromatin immunoprecipitation of BRG1 in cells depleted of *MITF*  
62 revealed that MITF recruits BRG1 to the promoters of specific genes, including *TYR*,  
63 which encodes the rate-limiting enzyme in melanin synthesis Tyrosinase (Laurette et  
64 al., 2015). Similar analysis suggested that SOX10 also recruits BRG1 to chromatin,  
65 and at some loci it does so in co-operation with MITF (Laurette et al., 2015).  
66 Conversely, there is evidence that PAX3 inhibits the activity of MITF at the *DCT*  
67 promoter (Lang et al., 2005). Furthermore, low MITF activity is associated with an  
68 invasive phenotype, and deletion or knockdown of *MITF* results in upregulation of  
69 genes that promote migration and invasion (Dilshat et al., 2021). MITF CUT&RUN  
70 peaks are found near some genes whose expression is upregulated in *MITF* mutant  
71 cells, implying MITF directly represses their expression (Dilshat et al., 2021). This set  
72 of MITF peaks is enriched for the binding site of FOXC1, a transcriptional repressor  
73 (Du et al., 2012), suggesting MITF has co-factors in its repressive function as well as  
74 its activating one.

75 The activating enhancer-binding family of transcription factors, comprising five  
76 members, TFAP2A-E, regulate development of many cell types and organs including  
77 neural crest, placodes, epidermis, trophectoderm, heart, kidney, and brain (Bamforth  
78 et al., 2001; Brewer et al., 2002; Knight et al., 2003; Kuckenberget al., 2012; Luo et  
79 al., 2002; Mitchell et al., 1991; Moser et al., 1997; Schorle et al., 1996; Tan et al.,  
80 2008; Wang et al., 2006). In several contexts, including melanocyte differentiation,  
81 TFAP2 paralogs function redundantly (Kołat et al., 2021; Li and Cornell, 2007; Van  
82 Otterloo et al., 2010; Wang et al., 2008). For instance, in zebrafish *tfap2a* loss-of-  
83 function mutant embryos the number of melanocytes is lower than normal and  
84 pigmentation is profoundly delayed relative to in wild type embryos; this phenotype is  
85 exacerbated if *tfap2a* mutant embryos are also depleted of *tfap2e* expression with  
86 antisense morpholinos (Van Otterloo et al., 2010). In zebrafish melanoma *Tfap2a*  
87 and *Tfap2e* also appear to act redundantly to promote proliferation and, interestingly,

88 to suppress cell adhesion and cell migration (Campbell et al., 2021). Consistent with  
89 redundant function of Tfp2 paralogs in the melanocyte lineage, in the skin of mouse  
90 embryos with neural-crest specific knockout of the two paralogs with highest  
91 expression, *Tfp2a* and *Tfp2b*, there are fewer-than-normal cells expressing  
92 markers of melanocytes (Seberg et al., 2017b).

93

94 Tfp2 paralogs and MITF appear to co-activate certain genes. For instance, in a  
95 human melanoma cell line, the *in vitro* enhancer activity of an element within an *IRF4*  
96 intron depended on the simultaneous binding of MITF and TFAP2 (Praetorius et al.,  
97 2013). Further, in zebrafish *tfap2a* and *mitfa* double mutant embryos there is a  
98 greater-than-additive reduction in the number, and level of pigmentation, of  
99 melanocytes in comparison to in single mutants (Seberg et al., 2017b). Evidence that  
100 Tfp2 paralogs and Mitfa operated in parallel, rather than Tfp2 paralogs functioning  
101 upstream of *mitfa* expression, is that in *tfap2a/tfap2e* doubly-depleted zebrafish  
102 embryos, *mitfa* expression, and the number of *mitfa*-expressing cells, are not  
103 significantly changed from *tfap2a* singly depleted embryos (Seberg et al., 2017b).  
104 Supporting parallel activity of Tfp2 paralogs and MITF, the promoters of MITF target  
105 genes are enriched for TFAP2 consensus binding sites (Laurette et al., 2015;  
106 Rambow et al., 2015). Moreover, ChIP-seq experiments in primary melanocytes  
107 suggest that TFAP2A and MITF bind overlapping regions of chromatin near genes  
108 encoding regulators of pigmentation (Seberg et al., 2017b). Collectively, these  
109 observations indicate that TFAP2 paralogs co-activate a subset of MITF target genes  
110 by binding at the same enhancers. Still unclear, however, is whether they also co-  
111 repress enhancers, and whether TFAP2 paralogs and MITF act cooperatively or  
112 independently at enhancers they co-regulate.

113 TFAP2 paralogs may serve as pioneer factors for MITF, although not all evidence  
114 supports this possibility. *Pioneer* or *initiating* TFs can bind nucleosome-bound DNA  
115 and recruit other TFs that lack this property called *settler* TFs (reviewed in Voss and  
116 Hager, 2014; Zaret, 2020; Zaret and Carroll, 2011). Evidence that TFAP2 paralogs  
117 are pioneer factors includes, first, that TFAP2 binding site is over-represented within  
118 DNase1-protected “footprints” in mouse embryonic stem cells induced to differentiate  
119 (Sherwood et al., 2014). Second, TFAP2A catalyzes assisted loading of androgen  
120 receptor (AR) in epididymis cells (Pihlajamaa et al., 2014) and estrogen receptor in

121 MCF-7 cells (Tan et al., 2011). Third, the TFAP2 binding site is enriched for at the  
122 center of ATAC-seq peaks, implying it has a strong effect on chromatin accessibility  
123 (Grossman et al., 2018). Fourth, ATAC-seq peaks in naïve-stated human ESC  
124 showed reduced openness in TFAP2C KO cells (Pastor et al., 2018), and forcing  
125 expression of TFAP2C in human ESC is sufficient to open chromatin at loci where it  
126 binds (Li et al., 2019). Finally, TFAP2A, TFAP2B and TFAP2C can bind  
127 nucleosomes (Fernandez Garcia et al., 2019). Together these findings support the  
128 possibility that TFAP2 displaces nucleosomes and thereby facilitates chromatin  
129 binding by MITF. However, it not clear that MITF needs a pioneer factor to bind  
130 chromatin. In the *dynamic-assisted-loading model*, all classes of TFs have short  
131 residency on chromatin (reviewed in Voss and Hager, 2014). *Initiating TFs* are able  
132 to recruit ATP-dependent chromatin remodelers (nBAF, SWI/SNF, INO80, ISWI,  
133 NURD) and thereby make chromatin accessible to other TFs, i.e., the *assisted TFs*  
134 (Swinstead et al., 2016b). As mentioned above, MITF binds various components of  
135 the SWI/SNF complex (Aras et al., 2019; de la Serna et al., 2006; Keenen et al.,  
136 2010) and the chromatin remodeler CHD7 (Laurette et al., 2015) and so meets the  
137 criteria for an initiating factor. If the dynamic-assisted-loading model holds in this  
138 situation, MITF would have no need for a pioneer factor like TFAP2 to assist its  
139 binding to chromatin.

140 To address these questions, we systematically tested the effect of loss of TFAP2  
141 paralogs on: nucleosome positioning, using the assay for transposase-accessible  
142 chromatin using sequencing (ATAC-seq) methodology; enhancer activity, using  
143 cleavage under targets and release using nuclease (CUT&RUN) with anti-H3K27Ac,  
144 anti-H3K4me3, and anti-H3K27me3; and binding of MITF, using CUT&RUN. We  
145 similarly assessed binding of TFAP2A in cells harboring loss of function mutations in  
146 *MITF*. Our results support the notion that TFAP2 factors behave like the canonical  
147 pioneer factor FOXA1: at many chromatin elements bound by TFAP2A, loss TFAP2  
148 led to loss of enhancer activity, and in a large subset, it also led to chromatin  
149 becoming condensed. In both of these subsets of TFAP2-activated enhancers, MITF  
150 binding was TFAP2 dependent. In addition, we find evidence that TFAP2 paralogs  
151 can also inhibit enhancers, and at a subset of those that they inhibit, they exclude  
152 binding of MITF. Finally, the analyses suggest TFAP2 directly inhibits many of the  
153 same genes that MITF inhibits, but we do not find evidence that TFAP2 and MITF

154 co-repress the same enhancers. Together these findings illuminate the mechanisms  
155 by which TFAP2 and MITF coordinately regulate differentiation of melanocytes and  
156 the phenotype of melanoma cells.

## 157 **Results**

### 158 **Tfap2a and Tfap2e redundantly promote the differentiation of zebrafish** 159 **embryonic melanocytes**

160 We first sought to use a zebrafish mutant to confirm an earlier conclusion based on  
161 morpholino-mediated knockdown that Tfap2 paralogs redundantly promote  
162 differentiation of embryonic melanophores. In the melanocyte lineage of zebrafish  
163 embryos, levels of *tfap2e* expression are high, those of *tfap2a* and *tfap2c* are lower  
164 (~30% of the level of *tfap2e*), and those of *tfap2b* are negligible (Higdon et al., 2013).  
165 We previously reported that wild-type (WT) embryos injected with antisense  
166 morpholino oligonucleotides (MO) targeting the splicing of *tfap2e* exhibit no overt  
167 phenotype, but embryos homozygous for a *tfap2a* loss-of-function allele (i.e., lockjaw  
168 , Knight et al., 2003), injected with the *tfap2e* MO have fewer embryonic melanocytes  
169 than counterparts injected with a non-targeting control MO, and pigmentation is  
170 delayed in them, although it occurs eventually (Van Otterloo et al., 2010). To confirm  
171 that the recovery of pigmentation did not simply reflect the transient effects of the  
172 *tfap2e* morpholino we used zinc-finger nucleases to engineer zebrafish lines  
173 harboring frame-shift-inducing mutations in *tfap2e* (details in **Supplemental Fig.**  
174 **S1A-B**). qPCR analysis showed that expression of the *tfap2e* transcript was  
175 significantly lower in *tfap2e* mutant than in WT embryos, suggesting nonsense-  
176 mediated decay (**Supplemental Fig. S1C**). As in embryos injected with *tfap2e* MO,  
177 there was no overt phenotype in homozygous *tfap2e* mutants (**Supplemental Fig.**  
178 **S1D-F**). However, in *tfap2a/tfap2e* double mutants the number of melanocytes was  
179 significantly reduced in the dorsal stripe at 29 hours post fertilization (hpf) relative to  
180 those in *tfap2a* single mutants. At this stage these cells were under-pigmented  
181 relative to in non-mutant siblings, although their pigmentation reached wild-type  
182 levels by 48 hpf (**Fig. 1A-E; Supplemental Fig. S1G-J**). In summary, the reduction  
183 in melanocyte number and delay in pigmentation in *tfap2a/tfap2e* double mutant  
184 versus WT embryos implies that TFAP2 paralogs promote melanocyte proliferation  
185 and differentiation in a redundant fashion.

## 186 **TFAP2A binds open and closed chromatin**

187 We next sought to learn TFAP2 paralogs interact with MITF in activating and  
188 repressing gene expression in a single cell line. We have reported the genes  
189 differentially expressed between SK-MEL-28 melanoma cells that are WT or  
190 harboring loss-of-function mutations in all alleles of MITF, as well as binding of MITF  
191 using cleavage under targets and release under nuclease (CUT&RUN) (Dilshat et  
192 al., 2021). Here, again using SK-MEL-28 melanoma cells, we carried out (1)  
193 CUT&RUN using antibodies to TFAP2A (i.e., TFAP2A peaks), (2) CUT&RUN using  
194 antibodies to chromatin marks indicative of active regulatory elements (H3K27Ac  
195 and H3K4Me3) (Creyghton et al., 2010; Pekowska et al., 2011), and of inactive  
196 chromatin (H3K27Me3) (Ringrose and Paro, 2004), and (3) ATAC-seq to distinguish  
197 between open and closed chromatin (Buenrostro et al., 2013). We used IgG as a  
198 background control and the MACS2 software to call peaks in each dataset  
199 (**Supplemental Fig. S2A-B**). Based on proximity to transcriptional start sites (TSS),  
200 about one-third of TFAP2A peaks appeared to be at or near promoters (within 3 kb  
201 of a TSS). As expected, these elements had strong H3K4Me3 signal (**Supplemental**  
202 **Fig. S2B**). At promoter-proximal TFAP2A peaks, the H3K27Ac signal in WT cells  
203 was relatively consistent, whereas at promoter-distal TFAP2A peaks the H3K27Ac  
204 signal ranged from high to background level (**Supplemental Fig. S2B-C**). About two-  
205 thirds of TFAP2A peaks overlapped ATAC-seq peaks, indicating that they were in  
206 open chromatin (**Supplemental Fig. S2D-E**). Of note, the read depth (height) of a  
207 peak approximates the number of chromosome molecules where TFAP2A binds.  
208 The average read depth of the TFAP2A peaks in closed chromatin was only about  
209 50% of that in open chromatin but was nonetheless 80-fold higher than the IgG  
210 background read depth (**Supplemental Fig. S2D-E, Supplemental Fig. S3A-B for**  
211 **example loci**). Importantly, the TFAP2 binding site was strongly enriched for in both  
212 TFAP2A-bound elements where the local ATAC-seq signal was called as a peak and  
213 in counterparts where it was not ( $p < 1 \times 10^{-1785}$  and  $p < 1 \times 10^{-4375}$ , respectively),  
214 supporting the idea that TFAP2A binds DNA directly even when the DNA is occupied  
215 by nucleosomes (**Supplemental Fig. S3C-D**). These results indicate that TFAP2A  
216 binds at both open and closed chromatin, consistent with it being a pioneer factor,  
217 and at enhancers and promoters with a range of activity levels.

218

219 **TFAP2A activates enhancers as in pioneer factor and non-pioneer factor**  
220 **modes**

221 We next sought to identify enhancers and promoters that TFAP2 paralogs regulate  
222 directly, and, of these, the fraction that they regulate as pioneer factors. To these  
223 ends we used Crispr/Cas9 methods to introduce frame-shift mutations into the  
224 *TFAP2* genes with high expression in SK-MEL-28 cells, *TFAP2A* and *TFAP2C*; we  
225 then carried out RNA-seq, ATAC-seq, and CUT&RUN with antibodies to H3K27Ac,  
226 H3K4me3, and H3K27me3. In two independent knockout clones (hereafter, *TFAP2*-  
227 KO cells), Western blot analysis showed an absence of immunoreactivity for both  
228 proteins (**Supplemental Fig. S4A-E**). Control clones (hereafter WT cells) were  
229 derived from the parental SK-MEL-28 line transiently transfected with Cas9 but not  
230 with guide RNAs. RNA-seq revealed that expression of 532 genes was  
231 downregulated, and expression of 609 genes was upregulated, in *TFAP2*-KO cells  
232 (i.e., in both clones) versus in WT cells (**Supplemental Fig. S5A volcano plot**). We  
233 will refer to these sets as “TFAP2-activated genes” and “TFAP2-inhibited genes,”  
234 respectively.

235 To identify candidates for enhancers directly activated by TFAP2 paralogs we first  
236 filtered TFAP2A peaks for those in chromatin that was open and active in WT cells  
237 (i.e., coinciding with peaks of ATAC-seq and H3K27Ac) (21,745/ 36,948 of TFAP2A  
238 peaks), then for those greater than 1 kb from a transcription start site (i.e., to filter out  
239 promoters) (11,005/ 21,745), and finally for those where the local H3K27Ac signal  
240 was significantly lower (adj  $p < 0.05$ ,  $\log_2FC < -1$ ) in *TFAP2*-KO cells relative to in  
241 WT cells (3,858/11,005).

242 To determine how often TFAP2 activates enhancers as a pioneer factor, at each  
243 directly TFAP2-activated enhancer we evaluated the ATAC-seq signal in WT and  
244 *TFAP2*-KO cells. At about half of the enhancers the ATAC-seq signal was also  
245 significantly lower (adj  $p < 0.05$ ,  $\log_2FC < -1$ ) in *TFAP2*-KO versus in WT cells (i.e.,  
246 the ATAC-seq signal was TFAP2-activated) (**Fig. 2A, E-E'**); at this subset we infer  
247 that TFAP2 paralogs function as pioneer factors. At the remaining half, the ATAC-  
248 seq signal was unchanged between *TFAP2*-KO versus WT cells (i.e., the ATAC-seq



249 signal was TFAP2-independent) (**Fig. 2B, F-F'**); at this subset we infer that TFAP2  
 250 paralogs do not function as pioneer factors but rather as a transcriptional activator.  
 251 Consistent with both subsets indeed being enhancers activated by TFAP2, both  
 252 were associated with TFAP2-activated genes. Interestingly, the association was  
 253 stronger for those where TFAP2 functions as a pioneer factor (**Fig. 2 I, J**) (**Table 1**  
 254 **and Table 2**). Moreover, at both subsets the H3K4me3 signal, which is associated  
 255 with enhancer activity (Pekowska et al., 2011), was reduced in *TFAP2*-KO cells  
 256 relative to in WT cells (**Fig. 2E'', F''**). While both subsets were strongly enriched for  
 257 the TFAP2 binding site and certain other binding sites (e.g., RUNX), the subset  
 258 pioneered by TFAP2 was more strongly enriched for the SOXE and MITF binding  
 259 sites, while the non-pioneered subset was more strongly enriched for the FRA1,  
 260 TEAD and the ZFX binding sites (**Fig. 2M, N**). Of note, FRA1 is a pioneer factor (Lee  
 261 et al., 2018) which could explain why these elements do not depend on TFAP2 to be  
 262 free of nucleosomes.

Table 1: Hypergeometric analysis: TFAP2 regulated enhancers and gene expression

| Regulatory element (Enhancer) | Effect of TFAP2 on H3K27Ac | Effect of TFAP2 on ATAC | Effect of TFAP2 on RNA-seq | N (# of elements) | OR   | LB   | UB    | p-value All DEG's              | p-value  Log2FC  >1            |
|-------------------------------|----------------------------|-------------------------|----------------------------|-------------------|------|------|-------|--------------------------------|--------------------------------|
| -                             | Activates                  | -                       | Activates                  | 3,838             | 2.36 | 2.06 | 2.70  | <b>2.8 x 10<sup>-33</sup></b>  | <b>1.12 x 10<sup>-14</sup></b> |
| -                             | Activates                  | -                       | Inhibits                   | 3,838             | 1.03 | 0.85 | 1.24  | 7.0 x 10 <sup>-01</sup>        | 5.9 x 10 <sup>-01</sup>        |
| -                             | Inhibits                   | -                       | Activates                  | 1,304             | 1.23 | 0.93 | 1.60  | 1.24 x 10 <sup>-1</sup>        | 7.1 x 10 <sup>-01</sup>        |
| -                             | Inhibits                   | -                       | Inhibits                   | 1,304             | 2.30 | 1.87 | 2.82  | 4.95 x 10 <sup>-14</sup>       | 4.8 x 10 <sup>-06</sup>        |
| Pioneered                     | Activates                  | Activates               | Activates                  | 2,002             | 2.60 | 2.23 | 3.06  | <b>5.44 x 10<sup>-29</sup></b> | <b>6.3 x 10<sup>-20</sup></b>  |
| Pioneered                     | Activates                  | Activates               | Inhibits                   | 2,002             | 1.08 | 0.80 | 1.25  | 9.0 x 10 <sup>-01</sup>        | 8.5 x 10 <sup>-01</sup>        |
| Non-Pioneered                 | Activates                  | Independent             | Activates                  | 1,836             | 1.90 | 1.57 | 2.30  | <b>2.45 x 10<sup>-10</sup></b> | <b>1.0 x 10<sup>-06</sup></b>  |
| Non-Pioneered                 | Activates                  | Independent             | Inhibits                   | 1,836             | 1.05 | 0.82 | 1.32  | 6.33 x 10 <sup>-01</sup>       | 2.8 x 10 <sup>-01</sup>        |
| Pioneered                     | Inhibits                   | Inhibits                | Activates                  | 864               | 0.68 | 0.33 | 1.251 | 2.9 x 10 <sup>-01</sup>        | 1.0 x 10 <sup>-00</sup>        |
| Pioneered                     | Inhibits                   | Inhibits                | Inhibits                   | 864               | 2.33 | 1.61 | 3.28  | <b>8.08 x 10<sup>-06</sup></b> | <b>9.44 x 10<sup>-05</sup></b> |
| Non-Pioneered                 | Inhibits                   | Independent             | Activates                  | 440               | 1.33 | 0.83 | 2.05  | 0.17                           | 0.83                           |
| Non-Pioneered                 | Inhibits                   | Independent             | Inhibits                   | 440               | 1.72 | 1.34 | 2.43  | 0.008                          | 0.23                           |

OR: odds ratio, LB: lower boundary, UB: upper boundary, ALL DEGs: all differentially expressed genes (FDR < 0.05) in *TFAP2*-KO clones (two independent clones, 4 replicates each) and WT (4 replicates) SK-MEL-28 cells. Log2FC: Log base 2 fold change. N: numbers of TFAP2 regulated enhancer peaks used in the analysis.

263

Table 2: Hypergeometric analysis: TFAP2-activated enhancer and promoters, and TFAP2-activated gene expression

| Enhancers and promoters | Effect of TFAP2 on H3K27Ac | Effect of TFAP2 on ATAC | Effect of TFAP2 on RNA-seq | N (# of elements) | OR   | LB   | UB   | p-value Log2FC < -1      |
|-------------------------|----------------------------|-------------------------|----------------------------|-------------------|------|------|------|--------------------------|
| All peaks               | -                          | -                       | Activates                  | 36,948            | 1.66 | 1.40 | 1.98 | 2.4 x 10 <sup>-08</sup>  |
| TFAP2A (open chromatin) | -                          | -                       | Activates                  | 26,373            | 1.62 | 1.36 | 1.92 | 1.6 x 10 <sup>-08</sup>  |
| TFAP2A peaks            | Activates                  | -                       | Activates                  | 4,601             | 3.11 | 2.57 | 3.9  | 6.0 x 10 <sup>-24</sup>  |
| TFAP2A peaks            | Activates                  | Independent             | Activates                  | 2,324             | 2.75 | 2.10 | 3.55 | 2.1 x 10 <sup>-12</sup>  |
| TFAP2A peaks            | -                          | Activates               | Activates                  | 5,443             | 2.58 | 2.3  | 2.89 | 3.9 x 10 <sup>-27</sup>  |
| TFAP2A peaks            | Independent                | Activates               | Activates                  | 3,241             | 2.97 | 2.73 | 3.70 | 8.8 x 10 <sup>-19</sup>  |
| TFAP2A peaks            | Activates                  | Activates               | Activates                  | 2,202             | 4.4  | 3.46 | 5.58 | 4.1 x 10 <sup>-27</sup>  |
| TFAP2A peaks            | Activates                  | OR                      | Activates                  | 7,842             | 3.80 | 3.1  | 4.60 | 1.44 x 10 <sup>-35</sup> |
| TFAP2A peaks            | Independent                | Independent             | Activates                  | 19,570            | 1.55 | 1.39 | 1.73 | 6.1 x 10 <sup>-02</sup>  |

OR: odds ratio, LB: lower boundary, UB: upper boundary, Log2FC: Log base 2 fold change. Differentially expressed genes in *TFAP2*-KO clones (two independent clones, 4 replicates each) and WT (4 replicates) SK-MEL-28 cells. N: numbers of TFAP2 regulated enhancer and promoter peaks used in the analysis.

264

## 265 TFAP2A inhibits enhancers by blocking the opening of chromatin

266 Because of evidence that TFAP2A directly represses gene expression (Lin et al.,  
 267 2016; Liu et al., 2007; Wong et al., 2012) we next sought to identify candidates for  
 268 enhancers directly inhibited by TFAP2 paralogs. To this end we filtered promoter-  
 269 distal TFAP2A peaks for those where the local H3K27Ac signal was higher in  
 270 *TFAP2*-KO cells than in WT cells (adj. p < 0.05, log2FC > 1). Analogously to TFAP2-  
 271 activated enhancers, candidate TFAP2-inhibited enhancers were split between a  
 272 subset where the ATAC-seq signal was higher in *TFAP2*-KO cells than in WT cells  
 273 (i.e., TFAP2-inhibited) (**Fig. 2C, G-G'**) and a subset where it was TFAP2-  
 274 independent (**Fig. 3D, H-H'**). The first subset was significantly associated with  
 275 TFAP2-inhibited genes (**Fig. 3K, Table 1 and Table 3**) and the average H3K4me3  
 276 signal at these sites was TFAP2-inhibited (**Fig. 3G''**). Because TFAP2 concomitantly  
 277 inhibits enhancer activity and chromatin accessibility, we define these enhancers as  
 278 inhibited by TFAP2 in pioneer factor-mode. The binding site for TFAP2 site was  
 279 strongly enriched for in these sites, as were those for ETS1 and CTCF (**Fig. 3O**),  
 280 both transcriptional repressors (Kim et al., 2015; Mavrothalassitis and Ghysdael,  
 281 2000). By contrast, the subset of candidate TFAP2-inhibited enhancers where the

282 ATAC-signal was TFAP2-independent was not associated with TFAP2-inhibited  
 283 genes (**Fig. 3L, Table 1**), and the average H3K4me3 signal at them was TFAP2  
 284 independent (**Fig. 3H''**). We infer these elements are not TFAP2-inhibited  
 285 enhancers, despite having elevated H3K27Ac signal in TFAP2-KO cells in  
 286 comparison to WT cells. In conclusion, at TFAP2-inhibited enhancers TFAP2  
 287 recruits machinery that condenses chromatin and inhibits enhancer activity; the  
 288 canonical pioneer factor FOXA1 also has this potential (Sekiya and Zaret, 2007;  
 289 Watts et al., 2011).

Table 3: Hypergeometric analysis: TFAP2-inhibited enhancers and promoters, and TFAP2-inhibited gene expression

| Enhancers and promoters   | Effect of TFAP2 on H3K27Ac | Effect of TFAP2 on ATAC | Effect of TFAP2 on RNA-seq | N (# of elements) | OR   | LB   | UB   | p-value  Log2FC  >1      |
|---------------------------|----------------------------|-------------------------|----------------------------|-------------------|------|------|------|--------------------------|
| TFAP2A (closed chromatin) | -                          | -                       | Inhibits                   | 12,931            | 1.39 | 1.15 | 1.69 | 8.0 x 10 <sup>-04</sup>  |
| TFAP2A (open chromatin)   | -                          | -                       | Inhibits                   | 26,373            | 1.06 | 0.90 | 1.25 | 4.8 x 10 <sup>-01</sup>  |
| TFAP2A peaks              | Inhibits                   | -                       | Inhibits                   | 2,830             | 1.68 | 1.31 | 2.13 | 5.1 x 10 <sup>-05</sup>  |
| TFAP2A peaks              | -                          | Inhibits                | Inhibits                   | 4,236             | 1.69 | 1.34 | 2.12 | 1.33 x 10 <sup>-05</sup> |
| TFAP2A peaks              | Inhibits                   | Inhibits                | Inhibits                   | 1,695             | 2.06 | 1.51 | 2.76 | 8.47 x 10 <sup>-06</sup> |
| TFAP2A peaks              | Inhibits                   | OR                      | Inhibits                   | 5,371             | 1.68 | 1.38 | 2.03 | 3.61 x 10 <sup>-07</sup> |
| TFAP2A peaks              | Independent                | Independent             | Inhibited                  | 21,848            | 0.98 | 0.82 | 1.15 | 7.0 x 10 <sup>-01</sup>  |

OR: odds ratio, LB: lower boundary, UB: upper boundary, Log2FC: Log base 2 fold change. Differentially expressed genes in *TFAP2*-KO clones (two independent clones, 4 replicates each) and WT (4 replicates) SK-MEL-28 cells. N: numbers of TFAP2 regulated enhancer and promoter peaks used in the analysis.

290

291 We similarly analyzed whether and how TFAP2 directly activates or directly inhibits  
 292 promoters. Although TFAP2A peaks are frequently found at promoters (8277 genes  
 293 have a TFAP2A peak within 1 kb of the TSS), it was uncommon for the underlying  
 294 H3K27Ac and H3K4Me3 signal to be elevated or reduced in *TFAP2* KO cells relative  
 295 to in WT cells (119 and 31 candidate for directly activated and directly inhibited  
 296 promoters, respectively). Similar to the trends for TFAP2-regulated enhancers, the  
 297 pioneered subset of TFAP2-activated promoters was more strongly associated with  
 298 TFAP2-activated genes than the non-pioneered subset, and only the pioneered  
 299 subset of TFAP2-inhibited promoters was associated with TFAP2-inhibited genes  
 300 (**Supplemental Fig. S6A-L; additional examples in Supplemental Fig. S7A-B**).

301

302 **At additional subsets of MITF peaks overlapping TFAP2A peaks, TFAP2**  
303 **facilitates chromatin access for MITF both in pioneer and non-pioneer factor**  
304 **modes**

305 A prediction of the TFAP2-as-pioneer-factor model is that binding of transcription  
306 factors, like MITF, will depend on TFAP2. Among 37,643 MITF peaks in WT SK-  
307 MEL-28 cells that we previously identified by CUT&RUN (Dilshat et al., 2021),  
308 15,752 (42%) overlap a TFAP2A peak (i.e., assessed in this study). Of these, 9,413  
309 (60%) were within open and active chromatin (**Supplemental Fig. S8A**). To assess  
310 MITF binding in the absence of TFAP2 we carried out anti-MITF CUT&RUN in  
311 *TFAP2-KO* cell lines. Of note, as *MITF* RNA levels in *TFAP2-KO* cells are only about  
312 60% of those in WT cells, an across the board decrease in the average height (read  
313 depth) of MITF peaks was possible. Instead, we observed that the average height of  
314 MITF peaks not overlapping TFAP2A peaks was equivalent in *TFAP2-KO* cells and  
315 in WT (**Supplemental Fig. S8B**). By contrast, among MITF peaks overlapping  
316 TFAP2A peaks (15,752), the height of 5,443 (35%) was significantly lower in *TFAP2-*  
317 *KO* cells than in WT cells (adj.  $p < 0.05$ ,  $\log_2FC < -1$ ). (**Fig. 3A-D; Supplemental**  
318 **Fig. S8C-D and Supplemental Fig. S9**). We refer to these as “TFAP2-dependent  
319 MITF peaks,” referring only to MITF peaks that appear to be directly TFAP2-  
320 dependent (because they overlap TFAP2A peaks in WT cells).

321

322 We reasoned that TFAP2 paralogs could facilitate MITF binding by displacing  
323 nucleosomes (i.e., in pioneer factor mode) or alternatively by elevating MITF’s affinity  
324 for open DNA. Consistent with both models, we observed that TFAP2-dependent  
325 MITF peaks were in three subsets with respect to the TFAP2-dependence of the  
326 underlying ATAC-seq signal. At about 57% (3,083/5,443) the ATAC-seq signal was  
327 significantly lower (**Fig. 3B-C, 3F-F’**), at 37% (2,022/5,443) it was unchanged (**Fig.**  
328 **3D, 3G-G’**), and at 6% it was higher (**Fig. 3E, 3H-H’**) in *TFAP2-KO* cells than in WT  
329 cells. The first two subsets were strongly associated with TFAP2-activated genes  
330 (Hypergeometric test;  $p\text{-value} = 8.4 \times 10^{-26}$  and  $p\text{-value} = 1.07 \times 10^{-13}$  respectively)  
331 and with MITF-activated genes (Hypergeometric test;  $p\text{-value} = 1.16 \times 10^{-21}$  and  $p\text{-}$   
332  $p\text{-value} = 4.3 \times 10^{-11}$  respectively) (**Table 4**). We infer that at the first subset, TFAP2 is

333 a pioneer factor, facilitating access for MITF and other transcription factors  
334 (illustrated in **Fig. 3F''**). Supporting this prediction, the transcription factor binding  
335 sites for MITF, SOX10, RUNX and FRA1 were strong enriched at such elements  
336 (**Fig. 3F'''**). At the second subset, TFAP2 is a transcriptional activator that recruits  
337 MITF, also functioning as a transcriptional activator; we presume another protein  
338 serves as a pioneer factor at this subset (illustrated in **Fig. 3G''**). Consistent with this  
339 notion, the binding site for JUN, a widely deployed pioneer factor (Vierbuchen et al.,  
340 2017), site is strongly enriched in these elements (**Fig. 3G'''**). Examples are shown  
341 of TFAP2-dependent MITF peaks near *FRMD4B*, *CYP7B1*, *TRPM1* *SOX9*, *EDNRB*,  
342 *MREG*, *GPR143*, *SNAI2*, *MEF2C*, *MYO5A*, *PAX3*, *EN1* and *FOXI3* genes (**Fig. 3B-D**  
343 **and Supplemental Fig. S8D**). At the third subset of TFAP2-dependent MITF peaks,  
344 where ATAC-seq signal was higher in *TFAP2*-KO cells than in WT cells  
345 (**Supplemental Fig. S10A-A'**), TFAP2 may serve as a pioneer factor for MITF in  
346 MITF's proposed role as transcriptional repressor (Dilshat et al., 2021) (**illustrated in**  
347 **Supplemental Fig. S10A''**). However, this category of element was not enriched  
348 near genes inhibited by either TFAP2 or MITF (Hypergeometric test; p-value =  $6.02 \times$   
349  $10^{-02}$  and p-value =  $9.12 \times 10^{-02}$  respectively). These results are consistent with  
350 TFAP2 facilitating access for MITF, in its transcriptional activator form, to enhancers  
351 in both pioneer-factor and non-pioneer factor modes.

Table 4: Hypergeometric analysis: TFAP2-dependent MITF peaks and gene expression

| TFAP2's effect on: MITF | Effect of TFAP2 on ATAC | Effect of TFAP2 on RNA-seq | N (# of elements) | OR    | LB    | UB    | p-value All DEG's      | p-value  Log2FC  >1    |
|-------------------------|-------------------------|----------------------------|-------------------|-------|-------|-------|------------------------|------------------------|
| TFAP2-dependent         | -                       | Activates                  | 5,443             | 2.96  | 2.56  | 3.43  | $3.47 \times 10^{-41}$ | $8.4 \times 10^{-26}$  |
| TFAP2-dependent         | -                       | Inhibits                   | 5,443             | 1.00  | 0.81  | 1.23  | $9.5 \times 10^{-01}$  | $7.2 \times 10^{-01}$  |
| TFAP2-dependent         | Activates               | Activates                  | 3,083             | 3.43  | 2.95  | 3.98  | $3.19 \times 10^{-49}$ | $1.16 \times 10^{-26}$ |
| TFAP2-dependent         | Activates               | Inhibits                   | 3,083             | 1.15  | 0.92  | 1.42  | $1.7 \times 10^{-01}$  | $4.0 \times 10^{-01}$  |
| TFAP2-dependent         | Independent             | Activates                  | 2,358             | 2.38  | 1.81  | 2.55  | $1.6 \times 10^{-16}$  | $1.07 \times 10^{-13}$ |
| TFAP2-dependent         | Independent             | Inhibits                   | 2,358             | 1.13  | 0.91  | 1.40  | $2.3 \times 10^{-01}$  | $4.0 \times 10^{-01}$  |
| Mutually dependent      | Activates               | Activates                  | 717               | 2.967 | 1.768 | 4.756 | $3.47 \times 10^{-05}$ | $9.28 \times 10^{-05}$ |
| Mutually dependent      | Activates               | Inhibits                   | 717               | 0.789 | 0.284 | 1.772 | $7.07 \times 10^{-01}$ | 1.00                   |
| TFAP2-inhibited         | Inhibits                | Activates                  | 924               | 0.73  | 0.48  | 1.06  | $1.11 \times 10^{-01}$ | 1.00                   |
| TFAP2-inhibited         | Inhibits                | Inhibits                   | 924               | 2.75  | 2.21  | 3.39  | $1.1 \times 10^{-17}$  | $3.5 \times 10^{-04}$  |
| TFAP2-inhibited         | Independent             | Activates                  | 681               | 1.18  | 0.80  | 1.68  | 1.00                   | 1.00                   |
| TFAP2-inhibited         | Independent             | Inhibits                   | 681               | 2.27  | 1.72  | 2.94  | $2.9 \times 10^{-08}$  | $1.2 \times 10^{-02}$  |

OR: odds ratio, LB: lower boundary, UB: upper boundary, ALL DEGs: all differentially expressed genes in *TFAP2*-KO clones (two independent clones, 4 replicates each) and WT (4 replicates) SK-MEL-28 cells. Log2C: Log base 2 fold change. N: numbers of TFAP2-dependent MITF peaks used in the analysis.

352

353

354 To test for the converse dependence, we carried out anti-TFAP2A CUT&RUN in  
 355 *MITF*-KO cells. *TFAP2A* mRNA levels were equivalent in *MITF*-KO and WT cells,  
 356 and the average TFAP2A peak height was globally equivalent by CUT&RUN. At 13%  
 357 (717/ 5334) of TFAP2-dependent MITF peaks, the TFAP2A peak was, reciprocally,  
 358 significantly reduced in *MITF*-KO cells (**Fig. 3A, C**). At such loci, the average ATAC-  
 359 seq was reduced in *TFAP2*-KO cells than in WT cells (**Fig. 3C, 3I-I'**). We termed  
 360 these peaks mutually-dependent (**illustrated in Fig. 3I''**). Interestingly, mutually-  
 361 dependent MITF/ TFAP2 peaks were enriched in binding motifs for TFAP2, MITF,  
 362 BRM2 and TEAD4 but, notably and unlike the other subsets of TFAP2-dependent  
 363 MITF peaks, not for SOXE (**Fig. 3I'''**). SOX10 co-binds many loci with MITF  
 364 (Laurette et al., 2015), if SOX10 is absent from mutually-dependent peaks this may  
 365 explain the dependence of TFAP2 binding on MITF at these sites. At ~40% (288/  
 366 717) of the mutually dependent peaks, the polycomb repressive histone mark  
 367 H3K27Me3 was significantly higher (including in the gene body) in *MITF*-KO cells

368 but, unexpectedly, not in *TFAP2*-KO cells, even though MITF binding was lower in  
369 *TFAP2*-KO cells (**illustrated in Fig 3I'**, **Supplemental Fig. 8E-G**).

370 In summary, at about one third of MITF peaks that overlap *TFAP2A* peaks the MITF  
371 binding depends on *TFAP2*. Such *TFAP2*-dependent MITF peaks occur both at loci  
372 where nucleosome packing depends on *TFAP2* (pioneer factor mode) and where it  
373 does not (non-pioneer factor mode). At a subset of *TFAP2*-dependent MITF peaks  
374 where *TFAP2* acts in pioneer factor mode and characterized by the absence of  
375 SOXE binding site *TFAP2A* binding is, reciprocally, MITF-dependent.

376 **At additional subsets of MITF peaks overlapping *TFAP2A* peaks, *TFAP2***  
377 **paralogs inhibit or have no effect on chromatin access for MITF**

378 In Figure 2 we established that at some *TFAP2A* peaks, *TFAP2* paralogs close  
379 chromatin, and presumably inhibit binding of transcription factors. Consistent with  
380 this prediction, among MITF peaks overlapping *TFAP2A* peaks, the height of 10%  
381 (1,605) was higher in *TFAP2*-KO cells than in WT cells (**Fig. 3A, E; Supplemental**  
382 **Fig. S9**). At 58% (924/1,605) of these, the ATAC-seq signal was also significantly  
383 higher in *TFAP2*-KO cells versus in WT cells (**violin plot, Fig. 3H, H', illustrated in**  
384 **Fig. 3H''**). A unique set of transcription factor binding sites, including that for SP1,  
385 NFY, JUN and TFE3, were enriched among such elements (**Fig. 3H'''**). Moreover,  
386 these elements were modestly associated with *TFAP2*-inhibited genes.

387 Of note, at the majority of MITF peaks that overlap *TFAP2A* peaks (65%, 10,418/  
388 15,752), the height was equivalent in *TFAP2*-KO and WT cells (**Supplemental Fig.**  
389 **S9**). Interestingly *TFAP2*-independent MITF peaks were not strongly enriched for the  
390 *TFAP2* binding site (**Supplemental Fig. S11A**), implying that *TFAP2* is attracted to  
391 many of these sites via other proteins rather than binding directly to the DNA. Such  
392 indirect binding may be less avid, as the average height *TFAP2*-independent MITF  
393 peaks was smaller than that of *TFAP2*-dependent MITF peaks (compare WT MITF  
394 signal in (**Supplemental Fig. S9, compare cluster 1 and 4 in WT cells**). As  
395 expected, *TFAP2*-independent MITF peaks were associated neither with *TFAP2*-  
396 activated nor *TFAP2*-inhibited genes.

397 ***TFAP2* and MITF co-regulate genes in the melanocyte gene regulatory network**

398 The delayed pigmentation in zebrafish *tfap2a/tfap2e* double mutants was consistent  
399 with two mechanisms which are not exclusive of one another. In the first mechanism,  
400 TFAP2 paralogs directly activate *MITF* expression, and thereby indirectly activate  
401 expression of pigmentation genes. In the second mechanism, TFAP2 paralogs  
402 directly activate expression of pigmentation genes. Supporting the first mechanism,  
403 there is a pioneered TFAP2-activated enhancer in intron 2 of the *MITF* gene  
404 (**Supplemental Fig. S12**), and *MITF* mRNA levels are about 40% lower in TFAP2-  
405 KO cells than in WT cells. However, the first mechanism predicts that loss of TFAP2  
406 would most strongly diminish the expression of the most highly MITF-dependent  
407 genes. However, many of the genes whose expression was most strongly reduced in  
408 *MITF*-KO cells compared to in WT cells were completely TFAP2-independent, or  
409 indeed were TFAP2-inhibited (**Supplemental Table 4**). To assess the second  
410 mechanism, we identified the set of genes activated directly by MITF, defined as  
411 MITF-activated genes associated with an MITF peak, and the set of genes directly  
412 activated by TFAP2, defined as TFAP2-activated genes associated with an TFAP2-  
413 activated enhancer (i.e., of pioneered or non-pioneered variety). Supporting the  
414 second mechanism, genes activated directly both by TFAP2 and by MITF were  
415 enriched for GO terms related to pigmentation (**Fig. 4B**), although genes related to  
416 pigmentation were among those apparently directly regulated solely by MITF or  
417 TFAP2 paralogs (**Fig. 4C**) (Baxter et al., 2019). We took a similar approach to  
418 identify genes directly inhibited by TFAP2 and/or by MITF (**Fig. 4D**). Genes directly  
419 inhibited by both were strongly enriched for GO terms related to cell adhesion and  
420 cell migration (**Fig. 4E**). In summary, reduced expression of pigmentation genes and  
421 elevated expression of invasion genes in *TFAP2*-KO cells compared to in WT cells is  
422 largely explained by the direct activation and inhibition, respectively, of these  
423 categories of genes by TFAP2 paralogs.

424 Considering the strong correlation of TFAP2-inhibited genes with cell migration we  
425 performed *in vitro* scratch-recovery-assays and characterized the migrative capacity  
426 of our TFAP2-KO cells. Unexpectedly, while WT SK-MEL-28 cells closed the wound  
427 after 24 hours, both of our *TFAP2*-KO clones (clone 4.3 and clone 2.12) failed to  
428 close the wound within that time (**Supplemental Fig. 13D**). This finding also  
429 contrasts with the observation that the expression *tfap2e* correlates negatively with  
430 the migratory capacity of zebrafish models of melanoma (Campbell et al., 2021), but



431 it is consistent with the accumulation of melanocytes in the dorsum of zebrafish  
432 *tfap2a* knockout embryos (Barrallo-Gimeno et al., 2004; Knight et al., 2004; Knight et  
433 al., 2003) and *tfap2a/ tfap2e* double mutant embryos (**Fig. 1, Supplemental Fig.S1**).  
434 Furthermore, these results are consistent our previous findings that knocking-down  
435 MITF negatively influences cell migration and invasion (Dilshat et al., 2021). The  
436 reduced migrative capacity of *TFAP2*-KO cells may be attributed to the strong up-  
437 regulation of genes associated with cell adhesion in *TFAP2*-KO cells.

438

439 Finally, we considered how *TFAP2* paralogs might regulate the phenotype in  
440 melanoma cells. Advanced melanoma is characterized by lower levels of *TFAP2A*  
441 than benign nevi (e.g., Huang et al., 1998), and low transcript levels of *tfap2*  
442 paralogs are associated with an invasive phenotype in zebrafish melanoma  
443 (Campbell et al., 2021). We examined the association of *TFAP2*-activated and  
444 *TFAP2*-repressed genes (**Supplemental Fig. 13A-C**) with gene expression profiles  
445 from melanoma tumors and melanoma cell lines with distinct phenotypes (Hoek et  
446 al., 2008a; Hoek et al., 2006; Jonsson et al., 2010; Rambow et al., 2018; Tirosh et  
447 al., 2016; Tsoi et al., 2018; Verfaillie et al., 2015). Enrichment analysis showed (Yu  
448 et al., 2012) melanoma profiles previously found to be associated with high levels of  
449 MITF activity were enriched for genes directly activated by *TFAP2*, including the  
450 subset associated with *TFAP2*-dependent MITF peaks (**Fig. 4F**). Moreover,  
451 melanoma profiles associated with low levels of MITF activity were enriched for  
452 genes directly by *TFAP2* (**Fig. 4F**).

453

## 454 **Discussion**

455

456 In this study, we confirm that *Tfap2* paralogs are necessary for timely pigmentation in  
457 zebrafish embryos, as well as for normal levels of the expression of pigmentation  
458 genes in a melanoma cell line. We also describe how *Tfap2* affects expression of  
459 such genes, and test the hypothesis that it makes chromatin more accessible to  
460 MITF, a transcription factor known to directly regulate the expression of pigmentation  
461 genes. The latter involved assessing the consequences of the loss of *MITF* alone,  
462 and that of both *TFAP2A* and *TFAP2C*, on global gene expression; on chromatin

463 marks indicative of enhancers, promoters, and repressed chromatin; on nucleosome  
464 positioning; and on the binding of TFAP2A to chromatin in *MITF* mutants and that of  
465 MITF to chromatin in *TFAP2A/TFAP2C* double mutants. Integration of these  
466 datasets yielded a deeper understanding of the mechanisms whereby TFAP2  
467 regulates gene expression than could be acquired by more traditional methods.

468

469 Integrating genomic data sets permitted us to identify genomic elements that were  
470 bound by TFAP2A in WT cells and that either lost or gained H3K27Ac signal in  
471 TFAP2-KO cells; we inferred that these elements were enhancers directly activated  
472 or inhibited by TFAP2. Of note, only a minority of TFAP2A peaks coincided with  
473 TFAP2-dependent enhancers. As expected by the *Tfap2* as pioneer factor model, at  
474 a subset of TFAP2A-dependnet enhancers the ATAC-signal was TFAP2-activated.  
475 Interestingly, there were elements where the ATAC-seq signal was TFAP2 activated  
476 but the H3K27Ac signal independent and such elements were strongly associated  
477 with TFAP2-activated genes. It was also interesting that at a subset of TFAP2-  
478 inhibited enhancers, loss of TFAP2 led to opening of the chromatin, implying that  
479 TFAP2 paralogs recruit distinct transcription factors, and that these in turn recruit  
480 either enzymes that open chromatin or enzymes that condense it, in locus-specific  
481 fashion. The latter is consistent with findings for FOXA1, which has been shown to  
482 recruit proteins that condense chromatin, like GRG3 (Sekiya and Zaret, 2007; Watts  
483 et al., 2011).

484

485 A second discovery from our analyses is that TFAP2 can activate enhancers in a  
486 non-pioneer factor mode. At a subset of TFAP2A peaks where the H3K27Ac signal  
487 was TFAP2-activated, the ATAC-seq signal was TFAP2-independent. Further  
488 evidence that such elements are TFAP2-dependent enhancers is that their average  
489 H3K4Me3 signal was also TFAP2-dependent. We infer that TFAP2 activates and  
490 inhibits these enhancers, but not as a pioneer factor. At such enhancers the  
491 continued presence of TFAP2 is necessary for continued acetylation of histone H3  
492 lysine 27 (H3K27Ac), which fits with evidence that TFAP2 binds the histone acetyl  
493 transferase p300/CBP (Braganca et al., 2003) and inhibits the NURD histone-  
494 deacetylase complex (White et al., 2021). TFAP2 may attract other transcription  
495 factors without affecting nucleosome positioning; indeed, some TFAP2-dependent  
496 MITF peaks were found at Non-pioneered TFAP2- activated enhancers. The fact that

497 the TFAP2 binding site is not strongly enriched at these Non-pioneered TFAP2-  
498 activated enhancers may imply that TFAP2 binds these elements indirectly. Finally,  
499 we refer to these elements as non-pioneered TFAP2-activated enhancers because  
500 in the absence of TFAP2 their activity is lost but chromatin stays open. Our  
501 experimental design could not rule out the possibility that TFAP2 stably pioneered  
502 these elements such that chromatin remained open (but not active) after TFAP2 was  
503 removed. A precedent for this scenario is that at a subset of elements pioneered by  
504 PAX7, chromatin remains open after the removal of PAX7 (Mayran et al., 2018).  
505 However, the observation that TFAP2 site is less enriched compared to that of  
506 pioneered TFAP2-activated enhancers, and that the binding sites of pioneer factors  
507 FOS and JUN are enriched (Bejjani et al., 2019), supports the alternative model that  
508 such elements are simply pioneered by different transcription factors.

509

510 A third finding from this study is that at a subset of MITF/TFAP2A co-bound peaks,  
511 MITF binding was reduced in *TFAP2-KO* cells. A subset of such TFAP2-dependent  
512 MITF peaks were present at Pioneered TFAP2-activated enhancers, and at *TFAP2-*  
513 independent NDRs (some of which were Non-pioneered TFAP2-activated  
514 enhancers, where the mechanism of recruitment of MITF is distinct). Thus, TFAP2  
515 modulates MITF activity at certain loci by providing access to chromatin. Of note, at  
516 a subset of MITF/TFAP2A peaks, TFAP2 binding was lost in *MITF-KO* cells. There is  
517 precedent for reciprocal binding for pioneer factors, in the cases of both FOXA1 and  
518 steroid hormone receptors, at subsets of sites where they are co-bound (Swinstead  
519 et al., 2016a). Why are all MITF/TFAP2A peaks not mutually dependent? Notably, at  
520 many MITF/TFAP2A mutually dependent peaks, the repressive mark H3K27Me3  
521 accumulated in MITF-KO cells. This is consistent with evidence a) that the SWI/SNF  
522 complex, which MITF probably recruits to such loci, competes for access to  
523 chromatin against the Polycomb repressor complex, which deposits H3K27Me3  
524 (Wilson et al., 2010), and b) that the binding of pioneer factors is impeded by  
525 condensed H3K27me3-positive chromatin (Petruk et al., 2017; Wilson et al., 2010).  
526 A possible explanation for this is that at TFAP2-dependent MITF peaks, some  
527 measure of BRG1 binding is retained, possibly recruited by another activator like  
528 SOX10, in MITF KO cells, but this is not the case for MITF/TFAP2A mutually  
529 dependent peaks.

530

531 Finally, our results suggest a mechanism that could account for how TFAP2  
532 promotes the pigmentation of embryonic melanophores, the expression of  
533 pigmentation genes, and possibly the proliferation of melanoma cells. First, *MITF*  
534 expression is lower in *TFAP2*-KO than WT cells. Second, because TFAP2 facilitates  
535 binding of MITF to enhancers and promoters of genes that govern pigmentation, the  
536 presence of TFAP2 leads to higher expression of those genes. Although the set of  
537 MITF-activated but TFAP2-independent genes was not enriched for pigmentation  
538 genes, it did include some such genes including *MLANA*, *TYRP1* and *PMEL*.  
539 Notably, despite lower MITF mRNA expression in *TFAP2*-KO cells, binding of MITF  
540 was unchanged at such genes. This might explain why zebrafish embryonic  
541 melanocytes become pigmented more slowly in *tfap2a/tfap2e* double mutants: the  
542 number of melanophores in these mutants animals was reduced in embryos  
543 depleted for *tfap2a*, singly or in combination with *tfap2e*, and the doubling time of  
544 TFAP2-KO cells was longer than that of their WT counterparts. Also, MITF is known  
545 to promote proliferation, but whether TFAP2 and MITF cooperate to promote  
546 proliferation remains unclear. The expression of genes promoting cell migration and  
547 invasion has been observed to be higher in cells with low versus high MITF activity  
548 (Rambow et al., 2019). Indeed we show evidence suggesting that TFAP2 paralogs  
549 directly suppress such genes, consistent with our previous findings (Campbell et al.,  
550 2021). Thus, independent of its other activities as a transcription factor, TFAP2  
551 determines which genes can be activated by MITF. In summary, MITF activity in  
552 melanoma cells – and thus the phenotypes of these cells – depend in part on the  
553 presence of transcription factors that give MITF access to specific regulatory  
554 elements.

555

## 556 **Materials and Methods**

557

### 558 **Zebrafish lines and maintenance**

559

560 *D. rerio* were maintained in the University of Iowa Animal Care Facility according to a  
561 standard protocol (protocol no. 6011616). All zebrafish experiments were performed  
562 in compliance with the ethical regulations of the Institutional Animal Care and Use  
563 Committee at the University of Iowa and in compliance with NIH guidelines.

564 Zebrafish embryos were maintained at 28.5 °C and staged by hours or days post-  
565 fertilization (hpf or dpf).

566

567

### 568 **Generation of a zebrafish *tfap2e* loss-of-function allele**

569

570 To generate the *tfap2e* loss-of-function allele, we designed paired (e.g., left and  
571 right) zinc finger nucleases (ZFN) targeting exon 2 of the *tfap2e* locus resulting in  
572 non-homologous end-joining and disruption of the open reading frame for *Tfap2e*.  
573 Briefly, the online tool, ZiFiT (Sander et al., 2010), was used to identify an optimal  
574 ZFN target site [utilizing the CoDa approach (Sander et al., 2011)]. Once identified, a  
575 custom DNA fragment encoding the entire left or right zinc finger array (ZFA) along  
576 with flanking XbaI and BamHI restriction sites was synthesized (Integrated DNA  
577 Technologies, Coralville, IA). Subsequently, the ZFA fragment was subcloned into  
578 pMLM290 (Addgene, plasmid 21872), which includes a modified FokI nuclease  
579 domain (Miller et al., 2007). Next, the fully assembled ZFN was PCR amplified,  
580 directionally cloned into pENTR-D/TOPO (ThermoFisher Scientific), and finally  
581 subcloned into pCS2+DEST using Gateway LR Clonase II enzyme mix  
582 (ThermoFisher Scientific). Once assembled, the final pCS2+ plasmids were  
583 sequence verified, linearized, mRNA synthesized in vitro (mMessage mMachine SP6  
584 Kit, Ambion/ThermoFisher Scientific). Synthesized RNA was cleaned using the  
585 Qiagen RNeasy Kit (Qiagen) and both left and right ZFN components were co-  
586 injected into 1-cell stage zebrafish embryos. Following injections, embryos were  
587 initially screened via PCR and restriction enzyme digest to confirm editing at the  
588 target site. Upon confirmation, additional embryos from a similar clutch (F0's) were  
589 allowed to develop into adulthood, 'mosaics' identified and out-crossed, and a stable  
590 F1 generation isolated.

591

### 592 **Cell lines, reagents, and antibodies**

593

594 The cells referred to as WT throughout the document are the parent SK-MEL-28  
595 (HTB-72) line. They and the derivative line, delta6-MITF knockout cells (referred to  
596 as MITF-KO cells in this work), were obtained from the laboratory of Dr. Eirikur  
597 Steingrimsson. The cells were grown in RPMI 1640 medium (Gibco #5240025)

598 supplemented with 10% FBS (Gibco #10270106) at 5% CO<sub>2</sub> and 37°C. Cells were  
599 tested for, and determined to be free of, mycoplasma. SK-MEL-28 cells harbor the  
600 BRAF<sup>V600E</sup> and p53<sup>L145R</sup> mutations (Leroy et al., 2014). The following primary  
601 antibodies and their respective dilutions were used in western blotting (WB) and  
602 CUT&RUN experiments: anti-Tubulin (Sigma, #T6199), 1:5000 (WB); anti-MITF  
603 (Sigma, #HPA003259), 1:2000 (WB), 1:100 (CUT&RUN); anti-TFAP2A (Abcam,  
604 ab108311), 1:5000 (WB), 1:200 (CUT&RUN); anti-TFAP2C (Santa-Cruz #SC-12762  
605 X ), 1:1000 (WB); anti-H3K27Ac (EMD Millipore, #07-360), 1:100 (CUT&RUN); anti-  
606 H3K4Me3 (EMD Millipore, #05-745R), 1:100 (CUT&RUN); H3K27Me3 (EMD  
607 Millipore, #07-449), 1:100 (CUT&RUN); Rabbit IgG (EMD Millipore,#12-370), 1:100  
608 (CUT&RUN); Mouse IgG (EMD Millipore, #12-371), 1:100 (CUT&RUN). The  
609 following secondary antibodies and their respective dilutions were used: Anti-mouse  
610 IgG(H+L) DyLight 800 conjugate (Cell Signaling Technologies, #5257), 1:20000; and  
611 anti-rabbit IgG(H+L) DyLight 680 conjugate Cell Signaling Technologies, #5366),  
612 1:100. Images were captured using an Odyssey CLx Imager (LICOR Biosciences).

613

614

### 615 **Purification of pA/G-MNase**

616

617 *E. coli* strain BL21-DE3 was transformed with plasmid DNA pAG-MNase-6xHis  
618 (Addgene, plasmid #123461). Recombinant pAG-MNase was purified from cells  
619 grown in LB medium to OD<sub>600</sub> 0.6 at 37°C. Cells were induced with 0.5 mM IPTG  
620 and cultured for 16 hours at 20°C. Cell pellets were homogenized in lysis buffer (10  
621 mM Tris, pH 7.5, 300 mM NaCl, 10 mM imidazole) containing lysozyme and  
622 protease inhibitors, then sonicated and the slurry was cleared by centrifugation (35K  
623 RPM, Ti70 rotor). The supernatant was subjected to IMAC chromatography (NI-NTA  
624 column) and to size-exclusion fractionation (Superdex 75) using a BioLogic DuoFlow  
625 QuadTec FPLC system (Bio-Rad). The purified pAG-MNase was concentrated by  
626 buffer exchange with ultrafiltration (Amicon Ultra-15, 10K). Finally, the purified pAG-  
627 MNase was diluted in dilution buffer (10 mM Tris pH7.5, 120 mM NaCl, 0.01mM  
628 EDTA, and 50% glycerol), and stored at -80°C.

629

### 630 **Generation of TFAP2A; TFAP2C knockout cell lines (TFAP2-KO)**

631

632 *TFAP2*-KO clones were generated using the Alt-R CRISPR-Cas9 technology from  
633 Integrated DNA Technologies (IDT). Briefly, crRNAs targeting exon 2 of *TFAP2A* and  
634 *TFAP2C* were designed using the Cas9 guide RNA design checker tool (crRNA  
635 sequences below). Equimolar concentrations of crRNA and tracrRNA (IDT,  
636 #1072532) were annealed to form gRNA complexes. The ribonucleoprotein (RNP)  
637 complex was prepared by mixing gRNAs and Cas9 protein (IDT #1081058). SK-  
638 MEL-28 cells were transfected with constructs encoding components of RNP  
639 complexes using the Lipofectamine CRISPRmax Cas9 transfection reagent  
640 (ThermoFisher #CMAX00015) following the manufacturer's protocol. Single-cell  
641 colonies were screened by PCR and Sanger sequencing using primers flanking the  
642 cut sites (primer sequences below). Mutant clones (clone 2.12 and clone 4.3) were  
643 selected and further screened by western blotting, using anti-*TFAP2A* and anti-  
644 *TFAP2C* antibodies. The control cell lines used in this study were generated  
645 following this protocol but without adding gRNA duplexes.

646  
647

| <b>crRNA</b>     | <b>Sequence (5'-3')</b>              |
|------------------|--------------------------------------|
| TFAP2A_ex2_gRNA1 | CGTCACGACGGCACCAGCAAGTTTTAGAGCTATGCT |
| TFAP2A_ex2_gRNA2 | CTTACCTCACGCCATCGAGGGTTTTAGAGCTATGCT |
| TFAP2C_ex2_gRNA1 | CGCCACGACGGGAGCAGCAAGTTTTAGAGCTATGCT |
| TFAP2C_ex2_gRNA2 | CCACGACATGCCTCACCAGAGTTTTAGAGCTATGCT |
| <b>Primers</b>   | <b>Sequence (5'-3')</b>              |
| TFAP2A_geno_Fw   | TCTCTTGTGCCCCCTCCATA                 |
| TFAP2A_geno_Rv   | GCCCACCGACTGTATGTTCCA                |
| TFAP2C_geno_Fw   | CCGTGACCCCGATTTTGGAT                 |
| TFAP2C_geno_Rv   | CGGCTTCACAGACATAGGCA                 |

648  
649

## 650 **SDS-PAGE and Western blotting**

651

652 *TFAP2*-KO and WT cells were washed in ice-cold PBS. RIPA buffer containing  
653 protease inhibitors (Roche, cOmplete Mini) was added and cells were lysed on ice  
654 for 20 minutes. Cell lysates were centrifuged at 14,000 g for 20 minutes and the  
655 quantity of protein in the supernatants was quantified using Bradford assays (Bio-

656 Rad #5000002). Laemmli sample buffer (Bio-Rad #1610747, 5% 2-mercaptoethanol)  
657 was added to 20 µg protein and samples were boiled at 95°C for 5 minutes before  
658 being loaded onto a 10% SDS-polyacrylamide gel (Bio-Rad #4568034). Protein was  
659 transferred to polyvinylidene fluoride (PVDF) membranes (Thermo Scientific  
660 #88520), which were incubated overnight with primary antibody. Membranes were  
661 washed 3 times with TBS-T and incubated with horseradish peroxidase-conjugated  
662 anti-rabbit or anti-mouse for 1 hour at room temperature, washed, and imaged using  
663 an Amersham Imager 600.

664

665

666

667

## 668 **ATAC-seq**

669

670 ATAC-seq was performed according to (Buenrostro et al., 2015; Liu et al., 2020) with  
671 minor alterations. Briefly, 70,000 *TFAP2*-KO cells (clone 2.12 and clone 4.3, four  
672 replicates each) and WT cells (four replicates) were lysed in ice-cold lysis buffer (10  
673 mM Tris-HCl, pH 7.4, 10 mM NaCl, 3 mM MgCl<sub>2</sub>, 0.1% NP-40; Sigma).

674 Transposition was performed directly on nuclei using 25 µl tagmentation reaction mix  
675 (Tagment DNA Buffer #15027866, Tagment DNA Enzyme #15027865 from Illumina  
676 Tagment DNA kit #20034210). Tagged DNA was subjected to PCR amplification and  
677 library indexing, using the NEBNext High-Fidelity 2x PCR Master Mix (New England  
678 Biolabs #M0451S) with Nextera DNA CD Indexes (Illumina #20015882), according to  
679 the following program: 72 °C for 5 minutes; 98 °C for 30 seconds; 12 cycles of 98 °C for  
680 10 seconds, 63 °C for 30 seconds, and 72 °C for 1 minute. The PCR product was  
681 purified with 1.8 times the volume of Ampure XP beads (Beckman Coulter #A63881).  
682 Library quality was assessed using a BioAnalyzer 2100 High Sensitivity DNA Chip  
683 (Agilent Technologies). All DNA libraries that exhibited a nucleosome pattern were  
684 pooled and processed for 150bp paired-end sequencing.

685

686

## 687 **ATAC-seq peak calling and differential analysis**

688



689 ATAC-seq was performed using 150 bp paired-end sequencing reads. Raw ATAC-  
690 seq reads were trimmed using Trim Galore Version 0.6.3 (Developed by Felix  
691 Krueger at the Babraham Institute) and aligned to human genome assembly hg19  
692 (GRCh37) using Bowtie 2 (Langmead and Salzberg, 2012; Langmead et al., 2009)  
693 with default parameters. Sorting, removal of PCR duplicates, and identification of  
694 fragments shorter than 100 bp as the nucleosome-depleted-regions (NDRs), was  
695 performed using BAM filter version 0.5.9. DeepTools version 3.3.0 (Ramírez et al.,  
696 2016) was used to check the reproducibility of the biological replicates and generate  
697 bigWig coverage files for visualization. Peaks were called using model-based  
698 analysis of ChIP-seq 2 (MACS2, version 2.1.1.20160309.6) (Zhang et al., 2008).  
699 NDRs for which accessibility differed between *TFAP2*-KO and WT cells were  
700 identified using DiffBind version 2.10 (Ross-Innes et al., 2012) with log<sub>2</sub> fold-change  
701 threshold of >1 and a false discovery rate (FDR) < 0.05. NDRs that are directly  
702 regulated by TFAP2 were identified by overlapping differentially accessible NDRs  
703 with anti-TFAP2A CUT&RUN peaks; a 1-bp window was used to define overlap.  
704 Peaks were assigned to genes using GREAT with a peak-to-gene association rule of  
705 the nearest-gene-within-100 kb (McLean et al., 2010). Both the raw ATAC-seq files  
706 and processed sequencing data presented in this manuscript have been deposited in  
707 the Gene Expression Omnibus (GEO) repository (GSE number pending).

708

709

## 710 **CUT&RUN**

711

712 CUT&RUN sequencing was performed in *TFAP2*-KO cells (clone 2.12 and clone 4.3,  
713 two replicates each) and WT cells (two replicates) as previously described (Meers et  
714 al., 2019; Skene and Henikoff, 2017), but with minor modifications. Cells in log-  
715 phase culture (approximately 80% confluent) were harvested by cell scraping,  
716 centrifuged at 600 g (Eppendorf, centrifuge 5424) and washed twice in calcium-free  
717 wash-buffer (20 mM HEPES, pH7.5, 150 mM NaCl, 0.5 mM spermidine, and  
718 protease inhibitor cocktail cOMplete Mini, EDTA-free from Roche). Pre-activated  
719 concanavalin A-coated magnetic beads (Bangs Laboratories, Inc) were added to cell  
720 suspensions ( $2 \times 10^5$  cells) and incubated for 15 minutes at 4°C. Antibody buffer  
721 (wash-buffer with 2mM EDTA and 0.05% digitonin) containing anti-TFAP2A, anti-  
722 MITF, anti-H3K4Me<sub>3</sub>, anti-H3K27Me<sub>3</sub>, anti-H3K27Ac or Rabbit IgG was added and

723 cells were incubated overnight at 4°C. Cells were washed in dig-wash buffer (wash  
724 buffer containing 0.03% digitonin), and pAG-MNase was added at a concentration of  
725 500 µg/mL. The pAG-MNase reactions were quenched with 2X Stop Buffer (340mM  
726 NaCl, 20mM EDTA, 4mM EGTA, 0.05% digitonin, 100 µg/mL RNase A (10 mg/mL,  
727 Thermo Fisher Scientific #EN0531), 50 µg/mL glycogen (20mg/mL, Thermo Fisher  
728 Scientific #R0561) and 2 pg/mL sonicated yeast spike-in control). Released DNA  
729 fragments were treated with 1µL/mL phosphatase K (20mg/mL, Thermo Fisher  
730 Scientific #25530049) for 1 hour at 50°C and purified by phenol/chloroform-extraction  
731 and ethanol-precipitation. Fragment sizes were analyzed using a 2100 Bioanalyzer  
732 (Agilent).

733

### 734 **CUT&RUN library preparation and data analysis**

735

736 CUT&RUN libraries were prepared using the KAPA Hyper Prep Kit (Roche). Quality  
737 control post-library amplification consisted of fragment analysis using the 2100  
738 Bioanalyzer (Agilent). Libraries were pooled, brought to equimolar concentrations,  
739 and sequenced with 150 bp paired-end reads on an Illumina HiSeq X platform  
740 (Novogene, Sacramento, CA). For quality control, paired-end FASTQ files were  
741 processed using FastQC (Babraham Bioinformatics). Reads were trimmed using  
742 Trim Galore Version 0.6.3 (Developed by Felix Krueger at the Babraham Institute)  
743 and then mapped against the hg19 genome assembly using Bowtie2 version 2.1.0  
744 (Langmead and Salzberg, 2012; Langmead et al., 2009). The mapping parameters  
745 and peak calling of MACS2 peaks (Zhang et al., 2008) were performed as previously  
746 described (Meers et al., 2019; Skene and Henikoff, 2017) against their matching  
747 control IgG samples. Differential analysis of H3K27Ac and of H3K27Me3 signal in  
748 WT and *TFAP2*-KO cells was preformed using MACS2 with a Log2 fold-change  
749 threshold of 1, and p-value < 1 x 10<sup>-5</sup>. Differential H3K4Me3, MITF and TFAP2A  
750 signal in WT, *TFAP2*-KO and when mentioned *MITF*-KO cells was determined using  
751 DiffBind version 2.10.0 (Ross-Innes et al., 2012) with a Log2 fold-change threshold  
752 of 1, and FDR < 0.05. DeepTools version 3.3.0 was used to check the reproducibility  
753 of the biological replicates, to generate bigwig normalized (RPKM) coverage files for  
754 visualization and to plot average CUT&RUN-seq and ATAC-seq profiles (-plotProfile)  
755 and generate heatmaps (-plotHeatmap) of normalized reads (Ramírez et al., 2016).  
756 MultiBigwigSummary was used to extract read counts (-outRawCounts) (Ramírez et

757 al., 2016) and Prism was used to generate Violin and Box plots. Peaks were  
758 assigned to genes using GREAT with a peak-to-gene association rule of the nearest-  
759 gene-within-100 kb (McLean et al., 2010)

760

761

762

### 763 **RNA-seq**

764

765 Four replicate RNA-seq experiments were performed on *TFAP2*-KO cells (clone 2.12  
766 and clone 4.3) and WT cells. Total RNA was extracted by direct cell lysis using the  
767 RNeasy Plus Mini Kit with QiaShredder (Qiagen #47134). RNA samples with an  
768 RNA integrity number (RIN) above nine were used for library generation and 150 bp  
769 paired-end sequencing on the Illumina HiSeq2500 platform (Novogene, Sacramento,  
770 CA). FASTQ sequence files were processed using FastQC (Babraham  
771 Bioinformatics) for quality control, and reads were trimmed using Trim Galore  
772 Version 0.6.3 (Developed by Felix Krueger at the Babraham Institute) and  
773 subsequently aligned to human genome assembly hg19 (GRCh37) using STAR  
774 (Dobin et al., 2013). The output of the --quantMode GeneCounts function of STAR  
775 was used for the calculation of differential transcript expression using DESeq2 (Love  
776 et al., 2014). The rlog function was used to generate log<sub>2</sub>-transformed normalized  
777 counts. Adjusted p-value < 0.05 was used as the threshold for statistically significant  
778 differences. Functional enrichment analyses was performed using PANTHER (Mi et  
779 al., 2021). A full list of genes differentially expressed between *TFAP2*-KO and WT  
780 cells is provided in Supplemental Table 1-3.

781

### 782 **Motif analyses**

783

784 Both de novo and known motifs were identified within 200 bp of *TFAP2*-activated  
785 and *TFAP2*-inhibited enhancer and promoter peak summits using HOMER (-  
786 findMotifsGenome).

787

### 788 **Statistical analysis**

789

790 Fisher's Exact Test was used to assess TFAP2-regulated elements (enhancers and  
791 promoters) with TFAP2-regulated gene expression. Data processing and analysis  
792 was performed in R and the code can be found at  
793 [https://GitHub.com/ahelv/Differential\\_Expression](https://GitHub.com/ahelv/Differential_Expression). GraphPad-Prism was used to  
794 perform Students t-test as indicated in the figure legends

795

## 796 **Wound scratch assay**

797

798 A total of 500K cells were seeded per well of 6-well plate (Thermo Scientific, #  
799 1483210) to reach confluent monolayer. Cells were incubated in serum free media  
800 for 6 hours before wounding with a 200  $\mu$ L pipette tip. Scratches were manually  
801 imaged on an inverted light microscope (Leica #10445930) every 6 hours over a 24-  
802 hour time period. The distance of scratch closure between WT and *TFAP2*-KO cells  
803 were analyzed with Image J software.

804

## 805 **Acknowledgements**

806 This work was supported by grants from the National Institutes of Health (NIH) to  
807 RAC (R01-AR062457), and a postdoctoral fellowship from the American Association  
808 for Anatomy (CK). The ES laboratory is supported by grants 207067 and 217768  
809 from the Research Fund of Iceland.

810

## 811 **Author Contributions**

812

813 Conceptualization: CK, RAC.

814 Formal analysis: CK, RD.

815 Funding acquisition: CK, ES, RAC.

816 Investigation: CK, RAC.

817 Methodology: CK, RD, HS, EVO, AH, GB.

818 Statistical analysis: CK, AH.

819 Supervision: ES, RAC.

820 Writing – original draft: CK, RAC.

Fig 1

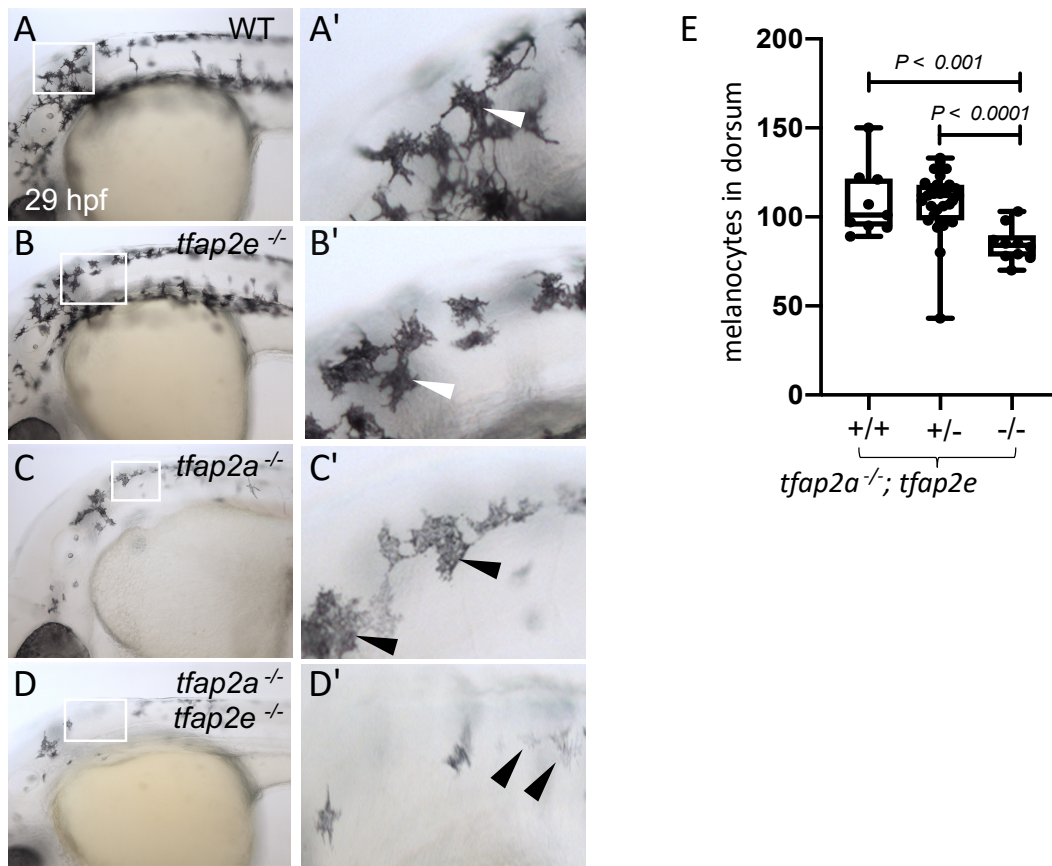

821  
822  
823

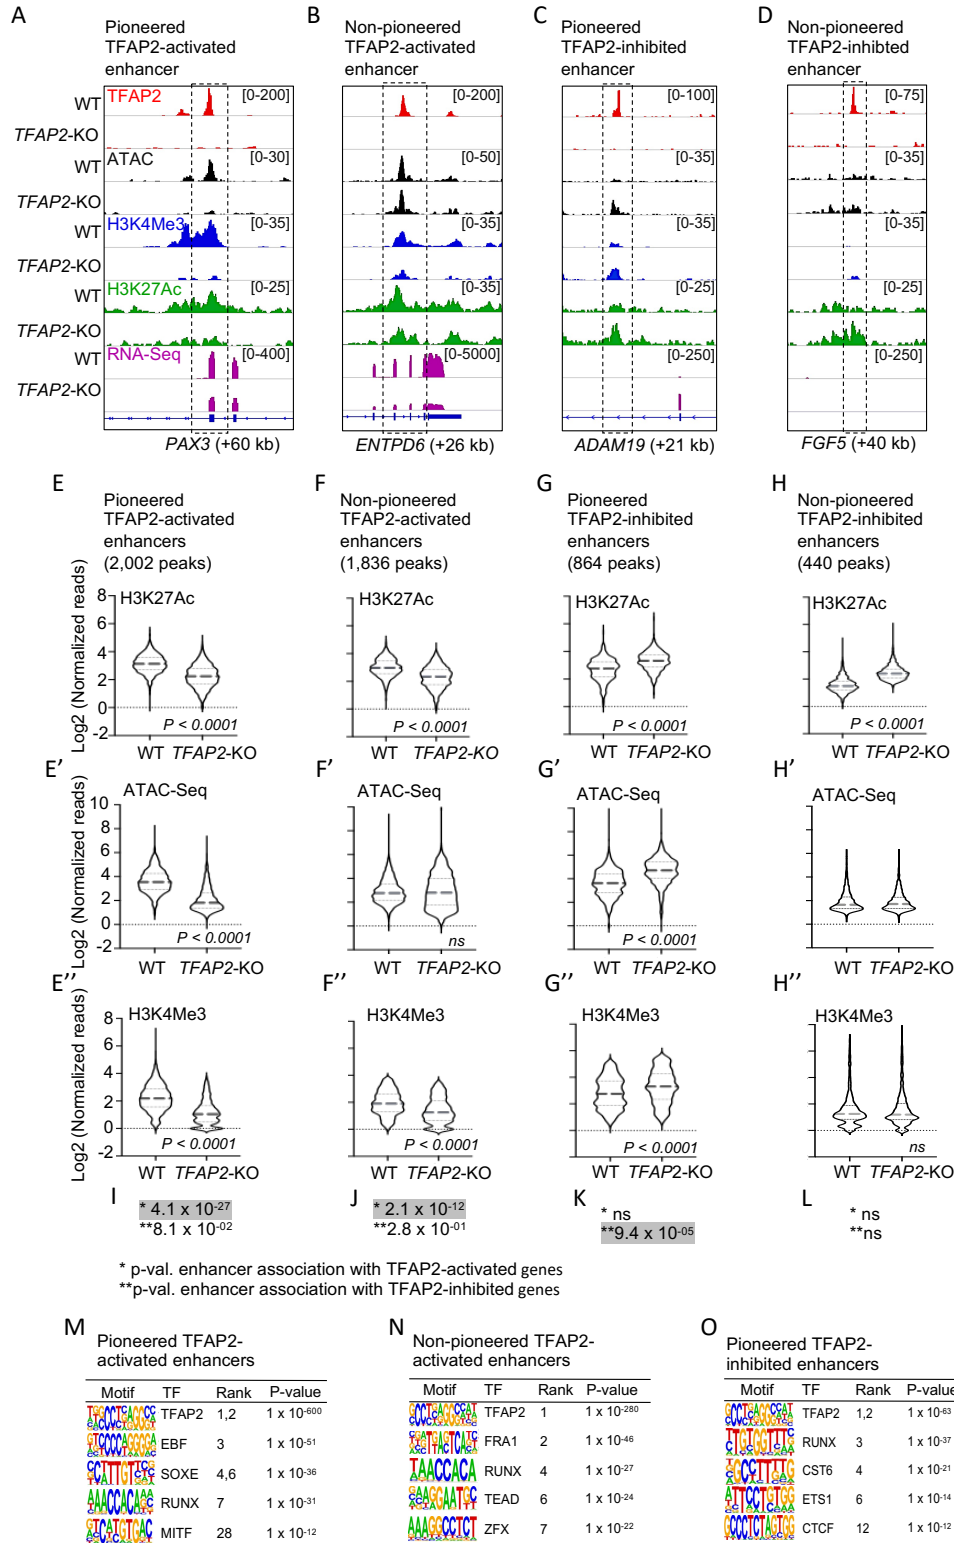

824

825

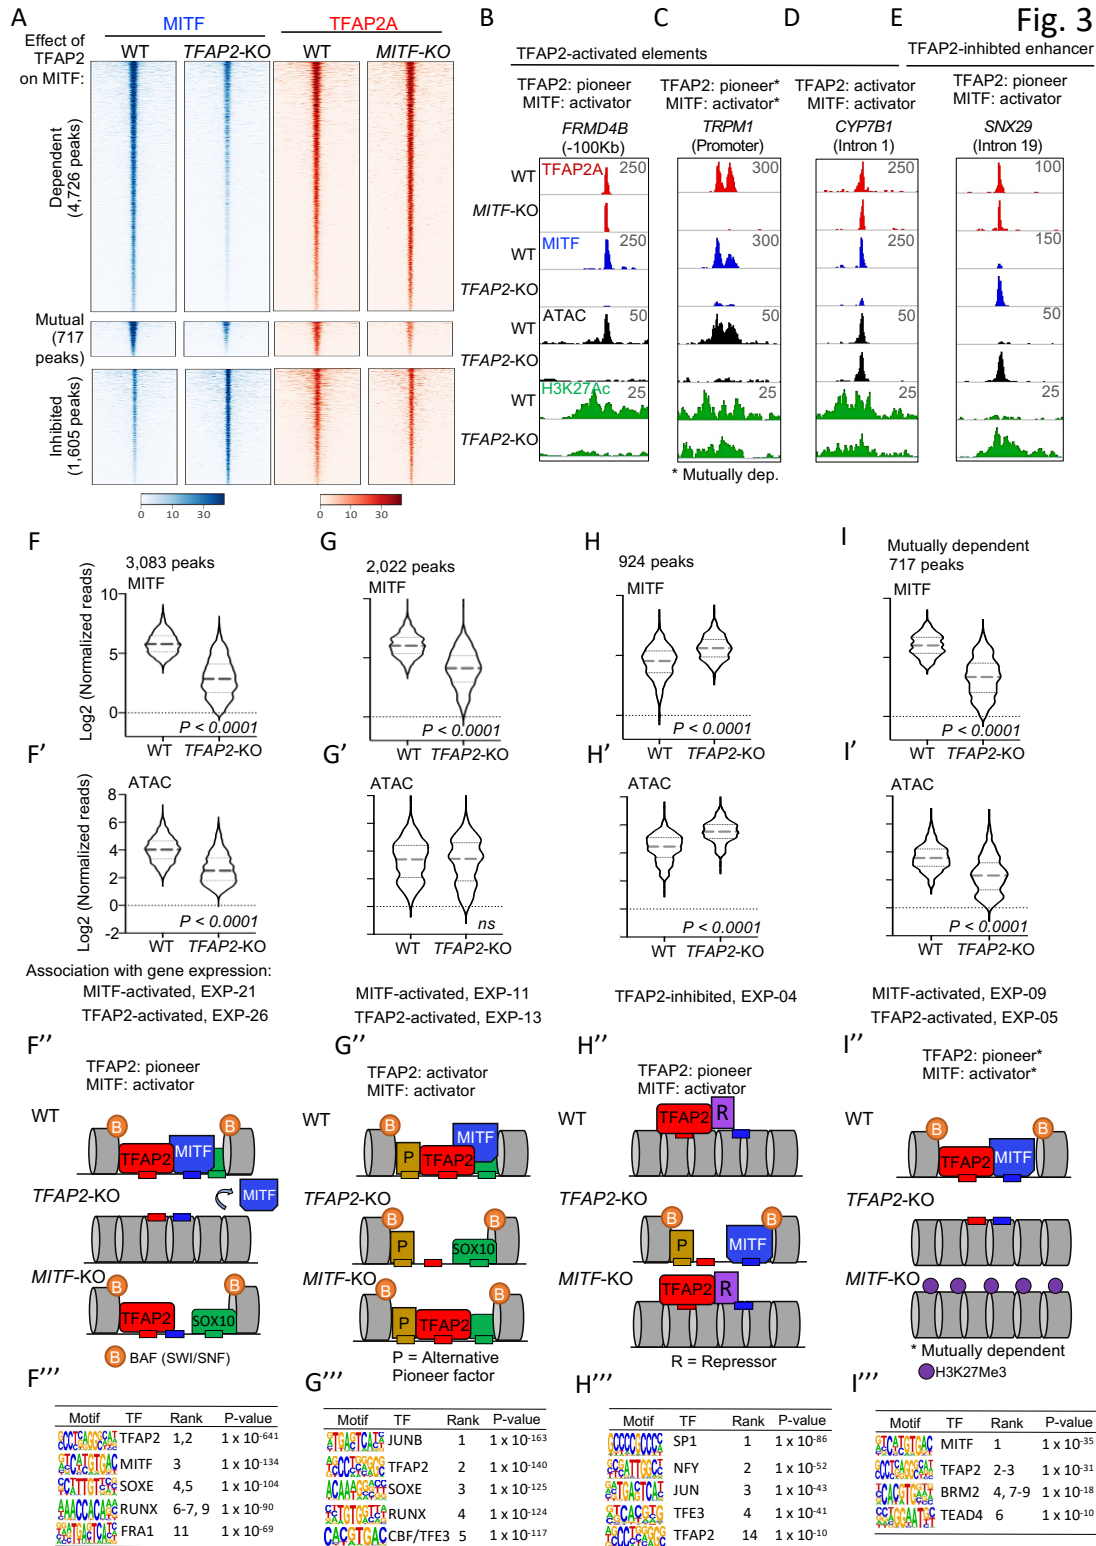

826

827

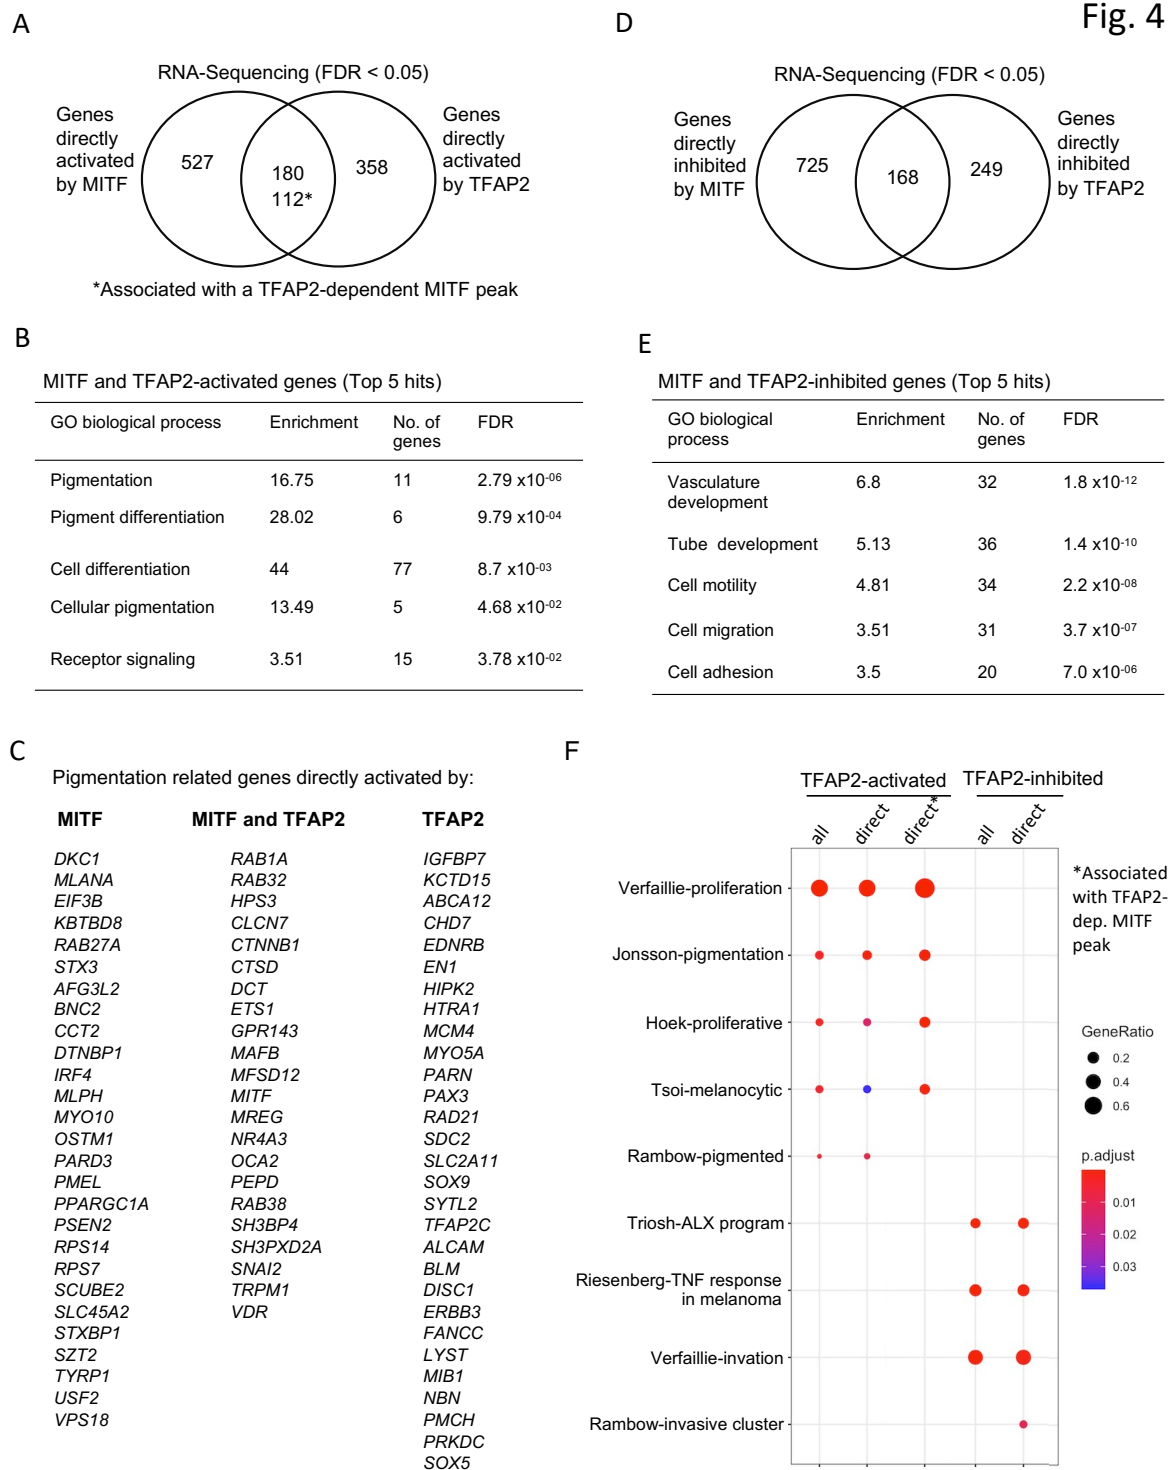

828

829



830

831

## 832 **Figure legends**

833

### 834 **Figure 1: Stable KO of *tfap2e* has no effect on pigmentation in WT embryos but** 835 **alters melanocyte development and delays melanin synthesis in *tfap2a***

836 **mutants. (A-D)** Lateral views of head and trunk of live embryos at 29 hpf, anterior to  
837 the left and dorsal to the top. **(A-A')** A WT (sibling) embryo with normal melanocytes  
838 (white arrowhead). **(B-B')** A *tfap2e*<sup>ui157ui/157</sup> embryo, with melanocytes that are normal  
839 in terms of number, differentiation and pigmentation (white arrowhead). **(C-C')** A  
840 *tfap2a*<sup>low/low</sup> homozygous mutant embryo, with fewer melanocytes than its  
841 *tfap2e*<sup>157/157</sup> and WT sibling embryos. **(D-D')** A *tfap2a*<sup>low/low</sup>; *tfap2e*<sup>157/157</sup> double-  
842 mutant embryo, with fewer melanin-producing melanophores than its *tfap2a*<sup>low/low</sup>  
843 sibling. **(E)** Box plot illustrating the number of pigmented melanocytes in the dorsum  
844 of WT (+/+), *tfap2a* mutant, *tfap2e* mutant, and double *tfap2a*; *tfap2e* mutant  
845 embryos at 36 hpf. Center line, mean; box limits, upper and lower quartiles;  
846 whiskers, minimum and maximum values; black dots, number of melanocytes per  
847 individual embryo (WT; n=9, *tfap2a*<sup>low/low</sup>; *tfap2e*<sup>+/157</sup>, n=32; *tfap2a*<sup>low/low</sup>; *tfap2e*<sup>157/157</sup>,  
848 n=10). P-value according to the Student's t-test.

849

### 850 **Figure 2: TFAP2 paralogs facilitate gene expression by opening and**

851 **condensing chromatin. (A-D)** Screenshot of IGV genome browser

852 (GRCH37/hg19), visualizing anti-TFAP2A CUT&RUN-seq (red), ATAC-seq (black),

853 anti-H3K4Me3 CUT&RUN-seq (blue), anti-H3K27Ac CUT&RUN-seq (green) and

854 RNA-seq (magenta) datasets at **(A)** a pioneered TFAP2-activated enhancer at the

855 *PAX3* (+60 kb) locus **(B)** a non-pioneered TFAP2A-activated enhancer at the

856 *ENTPD6* (+26kb) locus **(C)** a pioneered TFAP2-inhibited enhancer at the *ADAM19*

857 (+21 kb) locus and **(D)** a non-pioneered TFAP2A-inhibited enhancer at the *FGF5*

858 (+40kb) locus. Genotypes as labeled; y-axes are grouped scaled per dataset. **(E-E')**

859 Violin plots representing **(E)** anti-H3K27Ac (two independent replicates) **(E')** ATAC-

860 seq (four independent replicates) and **(E'')** anti-H3K4Me3 (two independent

861 replicates) normalized reads at pioneered TFAP2-activated enhancers. **(F-F')** Violin

862 plots representing **(F)** anti-H3K27Ac **(F')** ATAC-seq and **(E'')** anti-H3K4Me3

863 normalized reads at non-pioneered TFAP2-activated enhancers. **(G-G')** Violin plots

864 representing **(G)** anti-H3K27Ac **(G')** ATAC-seq and **(G'')** anti-H3K4Me3 normalized  
865 reads at pioneered TFAP2-inhibited enhancers. **(H-H'')** Violin plots representing **(H)**  
866 anti-H3K27Ac **(H')** ATAC-seq and **(H'')** anti-H3K4Me3 normalized reads at non-  
867 pioneered TFAP2-inhibited enhancers. P-values shown were determined by  
868 Students t-test. **(I-L)** Hypergeometric analysis of TFAP2 regulated enhancers at  
869 TFAP2-activated (\*) and TFAP2-inhibited (\*\*) genes in *TFAP2*-KO cells (FDR < 0.05,  
870  $|\log_2FC| > 1$ ). **(M-O)** Enrichment of transcription factor motifs at (M) pioneered  
871 TFAP2-activated enhancers, at (N) non-pioneered TFAP2-activated enhancers and  
872 at (O) pioneered TFAP2-inhibited enhancers as determined using HOMER motif  
873 analysis. P values were calculated using ZOOPS scoring (zero or one occurrence  
874 per sequence) coupled with hypergeometric enrichment analysis. TF; transcription  
875 factor.

876

877 **Figure 3: TFAP2 paralogs facilitate chromatin access by MITF.** **(A)** Density  
878 heatmaps of anti-MITF CUT&RUN-seq in SK-MEL-28 and *TFAP2*-KO cells, and anti-  
879 TFAP2 CUT&RUN-seq in SK-MEL-28 and *MITF*-KO cells at TFAP2-dependent MITF  
880 peaks (top), mutually dependent peaks (center) and TFAP2-inhibited MITF peaks  
881 (bottom). Number of peaks in each group as labelled. Regions shown are +/- 3 kb  
882 from peak center, normalized reads (RPKM). **(B-E)** Screenshot of IGV genome  
883 browser (GRCH37/hg19), showing anti-TFAP2A (red) CUT&RUN-seq in SK-MEL-28  
884 and *MITF*-KO cells, and anti-MITF (blue) CUT&RUN-seq, ATAC-seq (black) and  
885 anti-H3K27Ac (green) CUT&RUN-seq profiles in SK-MEL-28 and *TFAP2*-KO cells.  
886 Examples of MITF binding at **(B-D)** TFAP2-activated and **(E)** TFAP2-inhibited  
887 regulatory elements. Genotypes as labeled; y-axes are grouped scaled per dataset.  
888 **(F-F')** Violin plot representing **(F)** anti-MITF CUT&RUN-seq (two independent  
889 replicates) and **(F')** ATAC-seq (four independent replicates) at 3,083 pioneered  
890 TFAP2-activated MITF peaks. **(G-G')** Violin plot representing **(G)** anti-MITF  
891 CUT&RUN-seq and **(G')** ATAC-seq at 2,022 non-pioneered TFAP2-activated MITF  
892 peaks. **(H-H')** Violin plot representing **(H)** anti-MITF CUT&RUN-seq and **(H')** ATAC-  
893 seq at 924 pioneered TFAP2-inhibited MITF peaks and **(I-I')** Violin plot representing  
894 **(I)** anti-MITF CUT&RUN-seq and **(I')** ATAC-seq at 717 mutually dependent peaks. P-  
895 value according to Students t-test, ns; not statistically significant, normalized reads  
896 RPKM. Association with gene expression; hypergeometric analysis of TFAP2-  
897 pedent and TFAP2-inhibited MITF peaks are shown at TFAP2-activated and

898 MITF-activated genes (FDR < 0.05, log<sub>2</sub>FC > |1|). (**F''- I''**) Schematic representation  
899 of TFAP2-dependent and TFAP2-inhibited MITF peaks as labelled; B; BAF complex  
900 (SWI/SNF), P; alternative pioneer factor. R; repressor protein. Transcription factor  
901 binding sites indicated by small rectangles, TFAP2 (red), MITF (blue) and alternative  
902 pioneer factor (yellow), example activator SOX10 (green) . (**F''' – I'''**) Enrichment of  
903 transcription factor motifs using HOMER at (F''') pioneered TFAP2-dependent MITF  
904 peaks, (G''') non-pioneered TFAP2-dependent MITF peaks, (H''') TFAP2-inhibited  
905 MITF peaks and (I''') mutually dependent peaks. P values were calculated using  
906 ZOOPS scoring (zero or one occurrence per sequence) coupled with hypergeometric  
907 enrichment analysis. TF; transcription factor.

908

909 **Figure 4: TFAP2 and MITF co-regulate pigmentation and cell differentiation**

910 **genes in SK-MEL-28 cell lines. (A)** Venn diagram representing directly MITF  
911 activated genes (MITF peaks within 100Kb of a TSS), based on RNA-seq, in *MITF*-  
912 KO verses WT cells (FDR < 0.05) and genes directly activated by TFAP2 (TFAP2-  
913 activated enhancers within 100Kb of a TSS), based on RNA-seq, with TFAP2-  
914 activated enhancers, in *TFAP2*-KO verses WT cells (FDR < 0.05). The number of  
915 overlapping genes with TFAP2-dependent MITF peaks are also shown (\*). **(B)** Gene  
916 ontology (GO) biological process analysis (Top 5 hits) that are enriched among  
917 MITF- and TFAP2-activated genes. **(C)** A curated list of pigment-associated genes  
918 (Baxter et al., 2009) was intersected with directly MITF-activated, directly  
919 MITF/TFAP2-activated, and TFAP2-activated genes and represented by gene list.  
920 **(D)** Venn diagram representing directly MITF inhibited genes, based on RNA-seq, in  
921 *MITF*-KO verses WT cells (FDR < 0.05) and genes directly inhibited by TFAP2,  
922 based on RNA-seq, with TFAP2-inhibited enhancers, in *TFAP2*-KO verses WT cells  
923 (FDR < 0.05). **(E)** Gene ontology (GO) biological process analysis (Top 5 hits) that  
924 are enriched among MITF- and TFAP2-inhibited genes. GO analysis was performed  
925 using PANTHER. **(F)** Dot plot of enrichment analysis showing the enrichment of  
926 gene signatures from the literature in directly TFAP2-activated and TFAP2-inhibited  
927 genes, based on RNA-seq, in *TFAP2*-KO and SK-MEL-28 cells. P value is red  
928 lowest to blue highest; gene ratio is the ratio between genes and all genes in the GO  
929 category. Analysis of directly TFAP2-activated genes associated with TFAP2-  
930 dependent MITF peaks are shown (\*).

931

932 **Figure S1: *tfap2e* mutant zebrafish do not display a melanocyte phenotype**  
933 **whereas *tfap2a/e* double mutant zebrafish display a significant reduction in**  
934 **melanocyte number. (A)** A 157 base pair mutation at the end of *tfap2e* exon 2  
935 disrupts splicing and results in a premature stop codon. **(B)** PCR using primers in  
936 *tfap2e* exon 2 and intron 2 (e2-i2) amplifies a band of the expected 450 base pair  
937 size in *tfap2e* mutants but not wildtype (WT), whereas primers in exon 2 and exon 3  
938 (e2-e3) amplify only in wildtype. NTC: not template control. **(C)** qRT-PCR analysis of  
939 *tfap2e* expression shows that the transcript is strongly decreased in *tfap2e*<sup>-/-</sup>  
940 mutants, consistent with nonsense-mediated decay (Student's t-test, \*\*\*\* p<0.0001).  
941 **(D-E)** *tfap2e* mutant zebrafish at 36 hpf, *tfap2e*<sup>+/-</sup> **(D)** and *tfap2e*<sup>-/-</sup> **(E)** are  
942 phenotypically indistinguishable. **(F)** Histogram illustrating the number of pigmented  
943 melanocytes in the dorsum of *tfap2e*<sup>+/-</sup> and *tfap2e*<sup>-/-</sup> mutant zebrafish embryos,  
944 **(G-H)** Zebrafish embryos from a *tfap2a*<sup>+/-</sup>;*tfap2e*<sup>+/-</sup> incross at 48 hpf. **(G)** A wildtype  
945 embryo shows normal melanocyte patterning. **(H)** A *tfap2a*<sup>-/-</sup> mutant embryo has  
946 fewer and paler embryonic melanocytes than wildtype. **(I)** *tfap2a*<sup>-/-</sup>;*tfap2e*<sup>+/-</sup> and **(J)**  
947 *tfap2a*<sup>-/-</sup> ;*tfap2e*<sup>-/-</sup> appear phenotypically indistinguishable from *tfap2a*<sup>-/-</sup> at 48 hpf.

948

949 **Figure S2: TFAP2 binds to open and closed chromatin. (A)** Screenshot of IGV  
950 genome browser (GRCH37/hg19), visualizing anti-TFAP2A and IgG CUT&RUN-seq  
951 profiles. Peaks were called using MACS2 software (two independent replicates) and  
952 are illustrated by blue bars under the anti-TFAP2A track. **(B)** Density heatmap  
953 centred on the 36,867 TFAP2A peaks identified by anti-TFAP2A CUT&RUN in WT  
954 SK-MEL-28 cells. Regions shown are +/- 3 kb from peak center, Peaks were  
955 grouped by distance to an annotated transcriptional start site. Promoter peaks +/-  
956 3kb from a TSS and enhancers >3 kb from an TSS. Anti-TFAP2A, anti-H3K4Me3  
957 and anti-H3K27Ac CUT&RUN-seq, and ATAC-Seq profiles are shown. Normalized  
958 reads (RPKM). **(C)** Histogram representing H3K27Ac signal, binned from low-high  
959 read-depth on the x-axis and percentage of TFAP2A promoter peaks (black) and  
960 TFAP2A enhancer peaks (red) on the y-axis. **(D)** Violin plots illustrating TFAP2A and  
961 IgG normalized reads (RPKM) at nucleosome depleted regions (ATAC-peaks) and at  
962 nucleosome occupied DNA (no ATAC-peak) **(E)** Density heatmap representing  
963 TFAP2A CUT&RUN and ATAC-seq profiles at TFAP2A peaks that overlap  
964 nucleosome depleted regions (ATAC-peaks) and at nucleosome bound DNA (no  
965 ATAC-peak), the number of TFAP2A peaks in each group are as labeled.

966

967 **Figure S3: Example loci of TFAP2A peaks at open and closed chromatin. (A-B)**

968 IGV screenshots of TFAP2A peaks that **(A)** closed chromatin and **(B)** open  
969 chromatin, based on ATAC-seq, in SK-MEL-28 cells. Genes names and distance to  
970 a transcriptional start site as labeled. **(C)** HOMER motif analysis at TFAP2A peaks at  
971 closed chromatin and **(D)** at open chromatin. TF, transcription factors; the top  
972 ranking transcription factor motif is shown, with P-values calculated with HOMER-  
973 based hypergeometric enrichment analysis.

974

975 **Figure S4: Generation of TFAP2A; TFAP2C double mutant SK-MEL-28 cell**

976 **lines. (A)** RNA-seq showing transcript counts of TFAP2 paralogs in SK-MEL-28  
977 cells. Transcript counts for WT cells (n=4) and two *TFAP2A*;*TFAP2C* double  
978 knockout clones (4 replicates each) are shown. The expression of WT and mutant  
979 alleles of *TFAP2A* is comparable between cell lines whereas mutant alleles of  
980 *TFAP2C* are strongly reduced. **(B)** Two guide RNAs (crRNAs) each were designed  
981 to target exon 2 of *TFAP2A* and *TFAP2C* (yellow boxes). **(C)** A 401 base pair  
982 inversion and a 452 base pair deletion at exon 2 of *TFAP2A* and *TFAP2C*,  
983 respectively, was identified in clone 4.3. *TFAP2A* and *TFAP2C* mutant alleles  
984 resulted in a frame-shift and premature stop codon in alleles of both genes. **(D)** A  
985 405 base pair deletion at exon 2 of *TFAP2A* resulted in a frame-shift and premature  
986 stop codon in clone 2.12. A 455 base pair deletion, and a 70 base pair insertion, 1  
987 base pair deletion (Indel) was identified in exon 2 of *TFAP2C*. Such mutations  
988 resulted in a frame-shift and premature stop codon. Additional permutations were not  
989 identified at exon 2 of *TFAP2A* or *TFAP2C* in clone 4.3 or clone 2.12 cells. Inv;  
990 inversion, Del; deletion. **(E)** Western blot analysis confirming loss of TFAP2A and  
991 TFAP2C immunoactivity in clone 4.3 and clone 2.12 cell lines.

992

993 **Figure S5: TFAP2 paralogs activate and inhibit gene expression directly.**

994 **(A)** Volcano plot illustrating differential gene expression as determined by RNA  
995 sequencing of *TFAP2*-KO cells (two independent clones (2.12 and 4.3); four  
996 replicates each) versus WT cells (SK-MEL-28; four replicates). Log2 fold change  
997 (FC) of mean transcript levels on the x-axis and log2 p-value on the y-axis. Red dots  
998 represent direct target genes of TFAP2A that are differentially expressed (FDR <  
999 0.05, log2FC > |1|), as determined by anti-TFAP2 CUT&RUN in SK-MEL-28 cells.

1000 Gray dots represent genes that are differentially expressed but not bound by TFAP2.  
1001 The number and percentage of genes that are regulated by TFAP2 are specified.  
1002 Directly TFAP2A-dependent genes were identified based on the gene-association  
1003 rule (single nearest gene within 100 kb of a transcription start site).

1004

1005 **Figure S6: TFAP2 paralogs directly activate and inhibit promoters as pioneer**  
1006 **factors. (A-D)** Screenshot of IGV genome browser (GRCH37/hg19), visualizing anti-  
1007 TFAP2A CUT&RUN-seq (red), ATAC-seq (black), anti-H3K4Me3 CUT&RUN-seq  
1008 (turquoise), anti-H3K27Ac CUT&RUN-seq (green) and RNA-seq (magenta) datasets  
1009 at **(A-B)** TFAP2-activated promoters and **(C-D)** TFAP2-inhibited promoters.  
1010 Genotypes as labeled; y-axes are grouped scaled per dataset. **(E-E'')** Violin plots  
1011 representing **(E)** anti-H3K27Ac (two independent replicates) **(E')** ATAC-seq (four  
1012 independent replicates) and **(E'')** anti-H3K4Me3 (two independent replicates)  
1013 normalized reads at pioneered TFAP2-activated promoters. **(F-F'')** Violin plots  
1014 representing **(F)** anti-H3K27Ac **(F')** ATAC-seq and **(F'')** anti-H3K4Me3 normalized  
1015 reads at non-pioneered TFAP2-activated promoters. **(G-G'')** Violin plots representing  
1016 **(G)** anti-H3K27Ac **(G')** ATAC-seq and **(G'')** anti-H3K4Me3 normalized reads at  
1017 pioneered TFAP2-inhibited promoters. **(H-H'')** Violin plots representing **(H)** anti-  
1018 H3K27Ac **(H')** ATAC-seq and **(H'')** anti-H3K4Me3 normalized reads at non-  
1019 pioneered TFAP2-inhibited promoters. P-values shown were determined by Students  
1020 t-test. **(I-L)** Hypergeometric analysis of TFAP2 regulated enhancers at TFAP2-  
1021 activated (\*) and TFAP2-inhibited (\*\*) genes in *TFAP2*-KO cells (FDR < 0.05,  
1022  $|\log_2FC| > 1$ ). The number of promoters in each category of TFAP2-regulated  
1023 promoters is shown.

1024

1025 **Figure S7: Additional examples of TFAP2-activated and -inhibited promoters.**  
1026 **(A-B)** Screenshots of IGV genome browser (GRCH37/hg19) visualizing anti-  
1027 TFAP2A, anti-H3K4Me3, anti-H3K27Ac CUT&RUN-seq, ATAC-seq and RNA-seq  
1028 profiles at **(A)** the TFAP2-activated *ZNF540* promoter and **(B)** the TFAP2-inhibited  
1029 *S100A16* promoter. Genotypes as labeled; y-axes are grouped scaled per dataset.

1030

1031 **Figure S8: TFAP2 paralogs modulate the binding of MITF. (A)** Density heatmap  
1032 centred on 9,413 peaks co-bound by TFAP2A and MITF, showing anti-TFAP2, anti-  
1033 MITF, ATAC-seq, and anti-H3K27Ac CUT&RUN profiles in SK-MEL-28 cells.

1034 Regions shown are +/- 5 kb from peak center. **(B)** Violin plot showing anti-MITF  
1035 CUT&RUN signal (RPKM) in *TFAP2*-KO and SK-MEL-28 cells at loci not bound by  
1036 *TFAP2A*. ns; non-significant by Students t-test. **(C)** Scatterplot of *TFAP2*-dependent  
1037 MITF peaks showing log<sub>2</sub> normalized reads on the x-axis and log<sub>2</sub>FC on the y-axis  
1038 in *TFAP2*-KO versus WT cells. **(D)** Screenshots of IGV genome browser  
1039 (GRCH37/hg19); genotypes as labeled, visualizing anti-*TFAP2A* and anti-MITF  
1040 CUT&RUN-seq and ATAC-seq profiles at *TFAP2*-dependent MITF peaks, mutually  
1041 dependent MITF/*TFAP2* peaks and an example of a non-overlapping, *TFAP2*-  
1042 independent MITF peak. **(E)** Volcano plot showing increased H3K27Me3 CUT&RUN  
1043 signal at mutually dependent *TFAP2*/MITF peaks in *MITF*-KO cells versus WT cells.  
1044 P-values were determined by Students t-test. Normalized reads (RPKM), **(F-G)**  
1045 Screenshots of IGV genome browser (GRCH37/hg19), visualizing anti-H3K27Me3  
1046 CUT&RUN-seq profiles in *MITF*-KO and WT cells. Peaks were called using MACS2  
1047 software (two independent replicates) and are illustrated by blue bars. Two examples  
1048 loci of mutually dependent *TFAP2*/MITF peaks showing increased H3K27Me3  
1049 signals are shown, **(F)** at the *TRPM1* promoter and **(G)** at two *FRMD4B* enhancers.  
1050 Mutually-dependent peaks are indicated by red arrows.

1051

1052 **Figure S9: Density heatmap of *TFAP2* regulated MITF peaks.** Density heatmap  
1053 centred on *TFAP2* regulated MITF peaks (Top cluster) *TFAP2*-dependent MITF  
1054 peaks, (Second cluster) Mutually dependent *TFAP2*/MITF peaks, (third cluster)  
1055 *TFAP2*-inhibited MITF peaks and (forth cluster) independent peaks, showing two  
1056 replicates of anti-MITF CUT&RUN in SK-MEL-28 and *TFAP2*-KO cells, and two  
1057 replicates of anti-*TFAP2A* CUT&RUN in SK-MEL-28 and *MITF*-KO cells. Regions  
1058 shown are +/- 5 kb from peak center.

1059

1060 **Figure S10: *TFAP2* and MITF do not co-inhibit enhancers at *TFAP2*-inhibited or**  
1061 **MITF-inhibited genes in SK-MEL-28 cells.** **(A-A')** Violin plot of *TFAP2* dependent  
1062 MITF peaks at *TFAP2*-inhibited enhancers (i.e. co-inhibited enhancers) showing **(B)**  
1063 anti-MITF CUT&RUN and **(A')** ATAC-Seq profiles in *TFAP2*-KO and WT SK-MEL-28  
1064 cells. Such loci were not significantly enriched at MITF-inhibited or *TFAP2*-inhibited  
1065 genes. **(A'')** Schematic of *TFAP2*/ MITF co-inhibited enhancers. In this example  
1066 *TFAP2* is a pioneer factor recruiting MITF, in its repressor form, to condense  
1067 chromatin. Loss of *TFAP2* in *TFAP2*-KO cells results in loss of MITF-repressor

1068 binding and opening of chromatin by an alternative pioneer factor. **(B-B')** Violin plot  
1069 of TFAP2-inhibited MITF peaks at modestly TFAP2-inhibited enhancers showing **(C)**  
1070 anti-MITF CUT&RUN **(B')** ATAC-Seq profiles in *TFAP2-KO* and WT SK-MEL-28  
1071 cells. Such loci were not significantly enriched at MITF-inhibited or TFAP2-inhibited  
1072 genes. **(B'')** Schematic of TFAP2-inhibited MITF peaks at modestly inhibited  
1073 enhancers ( $\text{Log}_2\text{FC} > -0.5 - -1$ ). In this example TFAP2 recruits a repressor protein  
1074 and inhibits MITF binding in WT cells. In the absence of TFAP2, MITF recruits  
1075 SWI/SNF and opens chromatin via an alternative pioneer factor.

1076

1077 **Figure S11: Genes that harbor TFAP2-independent anti-MITF peaks are**  
1078 **enriched for cell cycle and DNA-repair. (A)** Plot-profile showing MITF CUT&RUN  
1079 peak signal at TFAP2-independent MITF peaks in *TFAP2-KO* and WT SK-MEL-28  
1080 cell lines. **(B)** Genes that harbor TFAP2-independent anti-MITF peaks were analyzed  
1081 for enriched gene ontology biological process using GREAT (single nearest gene +/-  
1082 100kb).

1083

1084 **Figure S12: Example of an TFAP2-dependent enhancer at intron 2 of MITF.**  
1085 Screenshot of IGV genome browser (GRCH37/hg19) visualizing anti-TFAP2A,  
1086 ATAC-seq, anti-H3K27Ac and RNA-seq profiles at intron 2 of MITF. Dashed  
1087 rectangle indicates an TFAP2-dependent NDR. MITF and downstream regions are  
1088 shown, blue arrows indicate strand orientation and horizontal rectangles the exons.  
1089 Genotypes are as labeled; y-axes are grouped scaled per dataset.

1090

1091 **Figure S13: TFAP2 directly activates genes associated with cell differentiation**  
1092 **and proliferation, and direct inhibits genes associated with cell adhesion and**  
1093 **cell migration. (A-B)** The top 55 genes that are directly TFAP2-activated and  
1094 associated with the GO terms **(A)** cell differentiation and pigmentation and **(B)**  
1095 proliferation are represented by heatmap ( $\text{log}_2\text{FC}$ ). **(C)** the top 55 genes that are  
1096 directly TFAP2-inhibited and associated with the GO terms cell adhesion and cell  
1097 migration are represented by heatmap ( $\text{log}_2\text{FC}$ ). C1: *TFAP2-KO* clone 4.3, C2:  
1098 *TFAP2-KO* clone 2.12. **(D)** Wound healing scratch-recovery-assay over 24 hours in  
1099 WT and *TFAP2-KO* cells. *TFAP2-KO* cells show reduced migration capacity  
1100 compared to wild type SK-MEL-28 cells.

1101



1102

1103 **References cited:**

1104

- 1105 Aras, S., Saladi, S.V., Basuroy, T., Marathe, H.G., Lores, P., de la Serna, I.L., 2019. BAF60A  
1106 mediates interactions between the microphthalmia-associated transcription factor and the  
1107 BRG1-containing SWI/SNF complex during melanocyte differentiation. *J Cell Physiol* 234,  
1108 11780-11791.
- 1109 Atchison, M.L., 2014. Function of YY1 in Long-Distance DNA Interactions. *Front Immunol*  
1110 5, 45.
- 1111 Bamforth, S.D., Braganca, J., Eloranta, J.J., Murdoch, J.N., Marques, F.I., Kranc, K.R.,  
1112 Farza, H., Henderson, D.J., Hurst, H.C., Bhattacharya, S., 2001. Cardiac malformations,  
1113 adrenal agenesis, neural crest defects and exencephaly in mice lacking *Cited2*, a new Tfp2  
1114 co-activator. *Nat Genet* 29, 469-474.
- 1115 Barrallo-Gimeno, A., Holzschuh, J., Driever, W., Knapik, E.W., 2004. Neural crest survival  
1116 and differentiation in zebrafish depends on *mont blanc/tfp2a* gene function. *Development*  
1117 131, 1463-1477.
- 1118 Baxter, L.L., Loftus, S.K., Pavan, W.J., 2009. Networks and pathways in pigmentation,  
1119 health, and disease. *Wiley Interdiscip Rev Syst Biol Med* 1, 359-371.
- 1120 Baxter, L.L., Watkins-Chow, D.E., Pavan, W.J., Loftus, S.K., 2019. A curated gene list for  
1121 expanding the horizons of pigmentation biology. *Pigment Cell Melanoma Res* 32, 348-358.
- 1122 Bejjani, F., Evanno, E., Zibara, K., Piechaczyk, M., Jariel-Encontre, I., 2019. The AP-1  
1123 transcriptional complex: Local switch or remote command? *Biochim Biophys Acta Rev*  
1124 *Cancer* 1872, 11-23.
- 1125 Betancur, P., Bronner-Fraser, M., Sauka-Spengler, T., 2010. Assembling neural crest  
1126 regulatory circuits into a gene regulatory network. *Annu Rev Cell Dev Biol* 26, 581-603.
- 1127 Braganca, J., Eloranta, J.J., Bamforth, S.D., Ibbitt, J.C., Hurst, H.C., Bhattacharya, S., 2003.  
1128 Physical and functional interactions among AP-2 transcription factors, p300/CREB-binding  
1129 protein, and *CITED2*. *The Journal of biological chemistry* 278, 16021-16029.
- 1130 Brewer, S., Jiang, X., Donaldson, S., Williams, T., Sucov, H.M., 2002. Requirement for AP-  
1131 2alpha in cardiac outflow tract morphogenesis. *Mech Dev* 110, 139-149.
- 1132 Buenrostro, J.D., Giresi, P.G., Zaba, L.C., Chang, H.Y., Greenleaf, W.J., 2013. Transposition  
1133 of native chromatin for fast and sensitive epigenomic profiling of open chromatin, DNA-  
1134 binding proteins and nucleosome position. *Nat Methods* 10, 1213-1218.
- 1135 Buenrostro, J.D., Wu, B., Chang, H.Y., Greenleaf, W.J., 2015. ATAC-seq: A Method for  
1136 Assaying Chromatin Accessibility Genome-Wide. *Curr Protoc Mol Biol* 109, 21.29.21-  
1137 21.29.29.
- 1138 Campbell, N.R., Rao, A., Zhang, M., Baron, M., Heilmann, S., Deforet, M., Kenny, C.,  
1139 Ferretti, L., Huang, T.-H., Garg, M., Nsengimana, J., Montal, E., Tagore, M., Hunter, M.,  
1140 Newton-Bishop, J., Middleton, M.R., Corrie, P., Adams, D.J., Rabbie, R., Levesque, M.P.,  
1141 Cornell, R.A., Yanai, I., Xavier, J.B., White, R.M., 2021. Cell state diversity promotes  
1142 metastasis through heterotypic cluster formation in melanoma. *Developmental Cell*,  
1143 2020.2008.2024.265140.
- 1144 Carreira, S., Goodall, J., Denat, L., Rodriguez, M., Nuciforo, P., Hoek, K.S., Testori, A.,  
1145 Larue, L., Goding, C.R., 2006. *Mitf* regulation of *Dial* controls melanoma proliferation and  
1146 invasiveness. *Genes Dev* 20, 3426-3439.
- 1147 Creighton, M.P., Cheng, A.W., Welstead, G.G., Kooistra, T., Carey, B.W., Steine, E.J.,  
1148 Hanna, J., Lodato, M.A., Frampton, G.M., Sharp, P.A., Boyer, L.A., Young, R.A., Jaenisch,

- 1149 R., 2010. Histone H3K27ac separates active from poised enhancers and predicts  
1150 developmental state. *Proc Natl Acad Sci U S A* 107, 21931-21936.
- 1151 de la Serna, I.L., Ohkawa, Y., Higashi, C., Dutta, C., Osias, J., Kommajosyula, N.,  
1152 Tachibana, T., Imbalzano, A.N., 2006. The microphthalmia-associated transcription factor  
1153 requires SWI/SNF enzymes to activate melanocyte-specific genes. *J Biol Chem* 281, 20233-  
1154 20241.
- 1155 Dilshat, R., Fock, V., Kenny, C., Gerritsen, I., Lasseur, R.M.J., Travnickova, J., Eichhoff,  
1156 O.M., Cerny, P., Moller, K., Sigurbjornsdottir, S., Kirty, K., Einarsdottir, B.O., Cheng, P.F.,  
1157 Levesque, M., Cornell, R.A., Patton, E.E., Larue, L., de Tayrac, M., Magnusdottir, E., Helga  
1158 Ogmundsdottir, M., Steingrimsson, E., 2021. MITF reprograms the extracellular matrix and  
1159 focal adhesion in melanoma. *Elife* 10.
- 1160 Dobin, A., Davis, C.A., Schlesinger, F., Drenkow, J., Zaleski, C., Jha, S., Batut, P., Chaisson,  
1161 M., Gingeras, T.R., 2013. STAR: ultrafast universal RNA-seq aligner. *Bioinformatics* 29, 15-  
1162 21.
- 1163 Du, J., Li, L., Ou, Z., Kong, C., Zhang, Y., Dong, Z., Zhu, S., Jiang, H., Shao, Z., Huang, B.,  
1164 Lu, J., 2012. FOXC1, a target of polycomb, inhibits metastasis of breast cancer cells. *Breast*  
1165 *Cancer Res Treat* 131, 65-73.
- 1166 Eckert, D., Buhl, S., Weber, S., Jager, R., Schorle, H., 2005. The AP-2 family of transcription  
1167 factors. *Genome Biol* 6, 246.
- 1168 Fernandez Garcia, M., Moore, C.D., Schulz, K.N., Alberto, O., Donague, G., Harrison, M.M.,  
1169 Zhu, H., Zaret, K.S., 2019. Structural Features of Transcription Factors Associating with  
1170 Nucleosome Binding. *Mol Cell* 75, 921-932 e926.
- 1171 Goding, C.R., 2000. Mitf from neural crest to melanoma: signal transduction and  
1172 transcription in the melanocyte lineage. *Genes Dev* 14, 1712-1728.
- 1173 Grossman, S.R., Engreitz, J., Ray, J.P., Nguyen, T.H., Hacohen, N., Lander, E.S., 2018.  
1174 Positional specificity of different transcription factor classes within enhancers. *Proc Natl*  
1175 *Acad Sci U S A* 115, E7222-E7230.
- 1176 Hartman, M.L., Czyz, M., 2015. MITF in melanoma: mechanisms behind its expression and  
1177 activity. *Cell Mol Life Sci* 72, 1249-1260.
- 1178 Higdon, C.W., Mitra, R.D., Johnson, S.L., 2013. Gene expression analysis of zebrafish  
1179 melanocytes, iridophores, and retinal pigmented epithelium reveals indicators of biological  
1180 function and developmental origin. *PLoS One* 8, e67801.
- 1181 Hoek, K.S., Eichhoff, O.M., Schlegel, N.C., Döbbeling, U., Kobert, N., Schaerer, L., Hemmi,  
1182 S., Dummer, R., 2008a. In vivo switching of human melanoma cells between proliferative  
1183 and invasive states. *Cancer Res* 68, 650-656.
- 1184 Hoek, K.S., Schlegel, N.C., Brafford, P., Sucker, A., Ugurel, S., Kumar, R., Weber, B.L.,  
1185 Nathanson, K.L., Phillips, D.J., Herlyn, M., Schadendorf, D., Dummer, R., 2006. Metastatic  
1186 potential of melanomas defined by specific gene expression profiles with no BRAF signature.  
1187 *Pigment Cell Res* 19, 290-302.
- 1188 Hoek, K.S., Schlegel, N.C., Eichhoff, O.M., Widmer, D.S., Praetorius, C., Einarsson, S.O.,  
1189 Valgeirsdottir, S., Bergsteinsdottir, K., Schepsky, A., Dummer, R., Steingrimsson, E., 2008b.  
1190 Novel MITF targets identified using a two-step DNA microarray strategy. *Pigment Cell*  
1191 *Melanoma Res* 21, 665-676.
- 1192 Huang, S., Jean, D., Luca, M., Tainsky, M.A., Bar-Eli, M., 1998. Loss of AP-2 results in  
1193 downregulation of c-KIT and enhancement of melanoma tumorigenicity and metastasis.  
1194 *EMBO J* 17, 4358-4369.
- 1195 Jonsson, G., Busch, C., Knappskog, S., Geisler, J., Miletic, H., Ringner, M., Lillehaug, J.R.,  
1196 Borg, A., Lonning, P.E., 2010. Gene expression profiling-based identification of molecular  
1197 subtypes in stage IV melanomas with different clinical outcome. *Clin Cancer Res* 16, 3356-  
1198 3367.

- 1199 Keenen, B., Qi, H., Saladi, S.V., Yeung, M., de la Serna, I.L., 2010. Heterogeneous  
1200 SWI/SNF chromatin remodeling complexes promote expression of microphthalmia-  
1201 associated transcription factor target genes in melanoma. *Oncogene* 29, 81-92.
- 1202 Kim, S., Yu, N.K., Kaang, B.K., 2015. CTCF as a multifunctional protein in genome  
1203 regulation and gene expression. *Exp Mol Med* 47, e166.
- 1204 Knight, R.D., Javidan, Y., Nelson, S., Zhang, T., Schilling, T., 2004. Skeletal and pigment  
1205 cell defects in the lockjaw mutant reveal multiple roles for zebrafish *tfap2a* in neural crest  
1206 development. *Dev Dyn* 229, 87-98.
- 1207 Knight, R.D., Nair, S., Nelson, S.S., Afshar, A., Javidan, Y., Geisler, R., Rauch, G.J.,  
1208 Schilling, T.F., 2003. lockjaw encodes a zebrafish *tfap2a* required for early neural crest  
1209 development. *Development* 130, 5755-5768.
- 1210 Kołat, D., Kałuzińska, Ż., Bednarek, A.K., Płuciennik, E., 2021. WWOX Loses the Ability to  
1211 Regulate Oncogenic AP-2 $\gamma$  and Synergizes with Tumor Suppressor AP-2 $\alpha$  in High-Grade  
1212 Bladder Cancer. *Cancers (Basel)* 13.
- 1213 Kuckenberger, P., Kubaczka, C., Schorle, H., 2012. The role of transcription factor  
1214 *Tcfap2c/TFAP2C* in trophoblast development. *Reprod Biomed Online* 25, 12-20.
- 1215 Lang, D., Lu, M.M., Huang, L., Engleka, K.A., Zhang, M., Chu, E.Y., Lipner, S., Skoultchi,  
1216 A., Millar, S.E., Epstein, J.A., 2005. Pax3 functions at a nodal point in melanocyte stem cell  
1217 differentiation. *Nature* 433, 884-887.
- 1218 Langmead, B., Salzberg, S.L., 2012. Fast gapped-read alignment with Bowtie 2. *Nat Methods*  
1219 9, 357-359.
- 1220 Langmead, B., Trapnell, C., Pop, M., Salzberg, S.L., 2009. Ultrafast and memory-efficient  
1221 alignment of short DNA sequences to the human genome. *Genome Biol* 10, R25.
- 1222 Laurette, P., Strub, T., Koludrovic, D., Keime, C., Le Gras, S., Seberg, H., Van Otterloo, E.,  
1223 Imrichova, H., Siddaway, R., Aerts, S., Cornell, R.A., Mengus, G., Davidson, I., 2015.  
1224 Transcription factor MITF and remodeler BRG1 define chromatin organisation at regulatory  
1225 elements in melanoma cells. *Elife* 4.
- 1226 Lee, B.K., Uprety, N., Jang, Y.J., Tucker, S.K., Rhee, C., LeBlanc, L., Beck, S., Kim, J.,  
1227 2018. Fos11 overexpression directly activates trophoblast-specific gene expression programs  
1228 in embryonic stem cells. *Stem Cell Res* 26, 95-102.
- 1229 Leroy, B., Girard, L., Hollestelle, A., Minna, J.D., Gazdar, A.F., Soussi, T., 2014. Analysis of  
1230 TP53 mutation status in human cancer cell lines: a reassessment. *Hum Mutat* 35, 756-765.
- 1231 Li, L., Wang, Y., Torkelson, J.L., Shankar, G., Pattison, J.M., Zhen, H.H., Fang, F., Duren,  
1232 Z., Xin, J., Gaddam, S., Melo, S.P., Piekos, S.N., Li, J., Liaw, E.J., Chen, L., Li, R., Wernig,  
1233 M., Wong, W.H., Chang, H.Y., Oro, A.E., 2019. TFAP2C- and p63-Dependent Networks  
1234 Sequentially Rearrange Chromatin Landscapes to Drive Human Epidermal Lineage  
1235 Commitment. *Cell Stem Cell* 24, 271-284 e278.
- 1236 Li, W., Cornell, R.A., 2007. Redundant activities of *Tfap2a* and *Tfap2c* are required for  
1237 neural crest induction and development of other non-neural ectoderm derivatives in zebrafish  
1238 embryos. *Dev Biol* 304, 338-354.
- 1239 Lin, C.Y., Chao, A., Wang, T.H., Lee, L.Y., Yang, L.Y., Tsai, C.L., Wang, H.S., Lai, C.H.,  
1240 2016. Nucleophosmin/B23 is a negative regulator of estrogen receptor alpha expression via  
1241 AP2 $\gamma$  in endometrial cancer cells. *Oncotarget* 7, 60038-60052.
- 1242 Liu, H., Duncan, K., Helverson, A., Kumari, P., Mumm, C., Xiao, Y., Carlson, J.C.,  
1243 Darbellay, F., Visel, A., Leslie, E., Breheny, P., Erives, A.J., Cornell, R.A., 2020. Analysis of  
1244 zebrafish periderm enhancers facilitates identification of a regulatory variant near human  
1245 KRT8/18. *Elife* 9.
- 1246 Liu, H., Tan, B.C., Tseng, K.H., Chuang, C.P., Yeh, C.W., Chen, K.D., Lee, S.C., Yung,  
1247 B.Y., 2007. Nucleophosmin acts as a novel AP2 $\alpha$ -binding transcriptional corepressor  
1248 during cell differentiation. *EMBO Rep* 8, 394-400.

- 1249 Love, M.I., Huber, W., Anders, S., 2014. Moderated estimation of fold change and dispersion  
1250 for RNA-seq data with DESeq2. *Genome Biol* 15, 550.
- 1251 Luo, T., Matsuo-Takasaki, M., Thomas, M.L., Weeks, D.L., Sargent, T.D., 2002.  
1252 Transcription factor AP-2 is an essential and direct regulator of epidermal development in  
1253 *Xenopus*. *Dev Biol* 245, 136-144.
- 1254 Mavrothalassitis, G., Ghysdael, J., 2000. Proteins of the ETS family with transcriptional  
1255 repressor activity. *Oncogene* 19, 6524-6532.
- 1256 Mayran, A., Khetchoumian, K., Hariri, F., Pastinen, T., Gauthier, Y., Balsalobre, A., Drouin,  
1257 J., 2018. Pioneer factor Pax7 deploys a stable enhancer repertoire for specification of cell  
1258 fate. *Nat Genet* 50, 259-269.
- 1259 McLean, C.Y., Bristor, D., Hiller, M., Clarke, S.L., Schaar, B.T., Lowe, C.B., Wenger, A.M.,  
1260 Bejerano, G., 2010. GREAT improves functional interpretation of cis-regulatory regions. *Nat*  
1261 *Biotechnol* 28, 495-501.
- 1262 Meers, M.P., Bryson, T.D., Henikoff, J.G., Henikoff, S., 2019. Improved CUT&RUN  
1263 chromatin profiling tools. *Elife* 8.
- 1264 Mi, H., Ebert, D., Muruganujan, A., Mills, C., Albu, L.P., Mushayamaha, T., Thomas, P.D.,  
1265 2021. PANTHER version 16: a revised family classification, tree-based classification tool,  
1266 enhancer regions and extensive API. *Nucleic Acids Res* 49, D394-d403.
- 1267 Miller, J.C., Holmes, M.C., Wang, J., Guschin, D.Y., Lee, Y.L., Rupniewski, I., Beausejour,  
1268 C.M., Waite, A.J., Wang, N.S., Kim, K.A., Gregory, P.D., Pabo, C.O., Rebar, E.J., 2007. An  
1269 improved zinc-finger nuclease architecture for highly specific genome editing. *Nat*  
1270 *Biotechnol* 25, 778-785.
- 1271 Mitchell, P.J., Timmons, P.M., Hebert, J.M., Rigby, P.W., Tjian, R., 1991. Transcription  
1272 factor AP-2 is expressed in neural crest cell lineages during mouse embryogenesis. *Genes*  
1273 *Dev* 5, 105-119.
- 1274 Mollaaghababa, R., Pavan, W.J., 2003. The importance of having your SOX on: role of  
1275 SOX10 in the development of neural crest-derived melanocytes and glia. *Oncogene* 22, 3024-  
1276 3034.
- 1277 Moser, M., Ruschoff, J., Buettner, R., 1997. Comparative analysis of AP-2 alpha and AP-2  
1278 beta gene expression during murine embryogenesis. *Developmental Dynamics* 208, 115-124.
- 1279 Pastor, W.A., Liu, W., Chen, D., Ho, J., Kim, R., Hunt, T.J., Lukianchikov, A., Liu, X., Polo,  
1280 J.M., Jacobsen, S.E., Clark, A.T., 2018. TFAP2C regulates transcription in human naive  
1281 pluripotency by opening enhancers. *Nat Cell Biol* 20, 553-564.
- 1282 Pekowska, A., Benoukraf, T., Zacarias-Cabeza, J., Belhocine, M., Koch, F., Holota, H.,  
1283 Imbert, J., Andrau, J.C., Ferrier, P., Spicuglia, S., 2011. H3K4 tri-methylation provides an  
1284 epigenetic signature of active enhancers. *EMBO J* 30, 4198-4210.
- 1285 Petruk, S., Cai, J., Sussman, R., Sun, G., Kovermann, S.K., Mariani, S.A., Calabretta, B.,  
1286 McMahan, S.B., Brock, H.W., Iacovitti, L., Mazo, A., 2017. Delayed Accumulation of  
1287 H3K27me3 on Nascent DNA Is Essential for Recruitment of Transcription Factors at Early  
1288 Stages of Stem Cell Differentiation. *Mol Cell* 66, 247-257 e245.
- 1289 Pihlajamaa, P., Sahu, B., Lyly, L., Aittomaki, V., Hautaniemi, S., Janne, O.A., 2014. Tissue-  
1290 specific pioneer factors associate with androgen receptor cistromes and transcription  
1291 programs. *EMBO J* 33, 312-326.
- 1292 Praetorius, C., Grill, C., Stacey, S.N., Metcalf, A.M., Gorkin, D.U., Robinson, K.C., Van  
1293 Otterloo, E., Kim, R.S., Bergsteinsdottir, K., Ogmundsdottir, M.H., Magnúsdottir, E., Mishra,  
1294 P.J., Davis, S.R., Guo, T., Zaidi, M.R., Helgason, A.S., Sigurdsson, M.I., Meltzer, P.S.,  
1295 Merlino, G., Petit, V., Larue, L., Loftus, S.K., Adams, D.R., Sobhifshar, U., Emre, N.C.,  
1296 Pavan, W.J., Cornell, R., Smith, A.G., McCallion, A.S., Fisher, D.E., Stefansson, K., Sturm,  
1297 R.A., Steingrimsson, E., 2013. A polymorphism in IRF4 affects human pigmentation through  
1298 a tyrosinase-dependent MITF/TFAP2A pathway. *Cell* 155, 1022-1033.

1299 Rambow, F., Job, B., Petit, V., Gesbert, F., Delmas, V., Seberg, H., Meurice, G., Van  
1300 Otterloo, E., Dessen, P., Robert, C., Gautheret, D., Cornell, R.A., Sarasin, A., Larue, L.,  
1301 2015. New Functional Signatures for Understanding Melanoma Biology from Tumor Cell  
1302 Lineage-Specific Analysis. *Cell Rep* 13, 840-853.  
1303 Rambow, F., Marine, J.C., Goding, C.R., 2019. Melanoma plasticity and phenotypic  
1304 diversity: therapeutic barriers and opportunities. *Genes Dev* 33, 1295-1318.  
1305 Rambow, F., Rogiers, A., Marin-Bejar, O., Aibar, S., Femel, J., Dewaele, M., Karras, P.,  
1306 Brown, D., Chang, Y.H., Debiec-Rychter, M., Adriaens, C., Radaelli, E., Wolter, P., Bechter,  
1307 O., Dummer, R., Levesque, M., Piris, A., Frederick, D.T., Boland, G., Flaherty, K.T., van den  
1308 Oord, J., Voet, T., Aerts, S., Lund, A.W., Marine, J.C., 2018. Toward Minimal Residual  
1309 Disease-Directed Therapy in Melanoma. *Cell* 174, 843-855 e819.  
1310 Ramírez, F., Ryan, D.P., Grüning, B., Bhardwaj, V., Kilpert, F., Richter, A.S., Heyne, S.,  
1311 Dündar, F., Manke, T., 2016. deepTools2: a next generation web server for deep-sequencing  
1312 data analysis. *Nucleic Acids Res* 44, W160-165.  
1313 Ringrose, L., Paro, R., 2004. Epigenetic regulation of cellular memory by the Polycomb and  
1314 Trithorax group proteins. *Annu Rev Genet* 38, 413-443.  
1315 Ross-Innes, C.S., Stark, R., Teschendorff, A.E., Holmes, K.A., Ali, H.R., Dunning, M.J.,  
1316 Brown, G.D., Gojis, O., Ellis, I.O., Green, A.R., Ali, S., Chin, S.F., Palmieri, C., Caldas, C.,  
1317 Carroll, J.S., 2012. Differential oestrogen receptor binding is associated with clinical  
1318 outcome in breast cancer. *Nature* 481, 389-393.  
1319 Sander, J.D., Dahlborg, E.J., Goodwin, M.J., Cade, L., Zhang, F., Cifuentes, D., Curtin, S.J.,  
1320 Blackburn, J.S., Thibodeau-Beganny, S., Qi, Y., Pierick, C.J., Hoffman, E., Maeder, M.L.,  
1321 Khayter, C., Reyon, D., Dobbs, D., Langenau, D.M., Stupar, R.M., Giraldez, A.J., Voytas,  
1322 D.F., Peterson, R.T., Yeh, J.R., Joung, J.K., 2011. Selection-free zinc-finger-nuclease  
1323 engineering by context-dependent assembly (CoDA). *Nat Methods* 8, 67-69.  
1324 Sander, J.D., Maeder, M.L., Reyon, D., Voytas, D.F., Joung, J.K., Dobbs, D., 2010. ZiFiT  
1325 (Zinc Finger Targeter): an updated zinc finger engineering tool. *Nucleic Acids Res* 38,  
1326 W462-468.  
1327 Schorle, H., Meier, P., Buchert, M., Jaenisch, R., Mitchell, P.J., 1996. Transcription factor  
1328 AP-2 essential for cranial closure and craniofacial development. *Nature* 381, 235-238.  
1329 Seberg, H.E., Van Otterloo, E., Cornell, R.A., 2017a. Beyond MITF: Multiple transcription  
1330 factors directly regulate the cellular phenotype in melanocytes and melanoma. *Pigment Cell*  
1331 *Melanoma Res* 30, 454-466.  
1332 Seberg, H.E., Van Otterloo, E., Loftus, S.K., Liu, H., Bonde, G., Sompallae, R., Gildea, D.E.,  
1333 Santana, J.F., Manak, J.R., Pavan, W.J., Williams, T., Cornell, R.A., 2017b. TFAP2 paralogs  
1334 regulate melanocyte differentiation in parallel with MITF. *PLoS Genet* 13, e1006636.  
1335 Sekiya, T., Zaret, K.S., 2007. Repression by Groucho/TLE/Grg proteins: genomic site  
1336 recruitment generates compacted chromatin in vitro and impairs activator binding in vivo.  
1337 *Mol Cell* 28, 291-303.  
1338 Sherwood, R.I., Hashimoto, T., O'Donnell, C.W., Lewis, S., Barkal, A.A., van Hoff, J.P.,  
1339 Karun, V., Jaakkola, T., Gifford, D.K., 2014. Discovery of directional and nondirectional  
1340 pioneer transcription factors by modeling DNase profile magnitude and shape. *Nat*  
1341 *Biotechnol* 32, 171-178.  
1342 Skene, P.J., Henikoff, S., 2017. An efficient targeted nuclease strategy for high-resolution  
1343 mapping of DNA binding sites. *Elife* 6.  
1344 Strub, T., Giuliano, S., Ye, T., Bonet, C., Keime, C., Kobi, D., Le Gras, S., Cormont, M.,  
1345 Ballotti, R., Bertolotto, C., Davidson, I., 2011. Essential role of microphthalmia transcription  
1346 factor for DNA replication, mitosis and genomic stability in melanoma. *Oncogene* 30, 2319-  
1347 2332.

1348 Swinstead, E.E., Miranda, T.B., Paakinaho, V., Baek, S., Goldstein, I., Hawkins, M.,  
1349 Karpova, T.S., Ball, D., Mazza, D., Lavis, L.D., Grimm, J.B., Morisaki, T., Grontved, L.,  
1350 Presman, D.M., Hager, G.L., 2016a. Steroid Receptors Reprogram FoxA1 Occupancy  
1351 through Dynamic Chromatin Transitions. *Cell* 165, 593-605.  
1352 Swinstead, E.E., Paakinaho, V., Presman, D.M., Hager, G.L., 2016b. Pioneer factors and  
1353 ATP-dependent chromatin remodeling factors interact dynamically: A new perspective:  
1354 Multiple transcription factors can effect chromatin pioneer functions through dynamic  
1355 interactions with ATP-dependent chromatin remodeling factors. *Bioessays* 38, 1150-1157.  
1356 Tan, C.C., Sindhu, K.V., Li, S., Nishio, H., Stoller, J.Z., Oishi, K., Puttreddy, S., Lee, T.J.,  
1357 Epstein, J.A., Walsh, M.J., Gelb, B.D., 2008. Transcription factor Ap2delta associates with  
1358 Ash2l and ALR, a trithorax family histone methyltransferase, to activate Hoxc8 transcription.  
1359 *Proc Natl Acad Sci U S A* 105, 7472-7477.  
1360 Tan, S.K., Lin, Z.H., Chang, C.W., Varang, V., Chng, K.R., Pan, Y.F., Yong, E.L., Sung,  
1361 W.K., Cheung, E., 2011. AP-2gamma regulates oestrogen receptor-mediated long-range  
1362 chromatin interaction and gene transcription. *EMBO J* 30, 2569-2581.  
1363 Tirosh, I., Izar, B., Prakadan, S.M., Wadsworth, M.H., 2nd, Treacy, D., Trombetta, J.J.,  
1364 Rotem, A., Rodman, C., Lian, C., Murphy, G., Fallahi-Sichani, M., Dutton-Regester, K., Lin,  
1365 J.R., Cohen, O., Shah, P., Lu, D., Genshaft, A.S., Hughes, T.K., Ziegler, C.G., Kazer, S.W.,  
1366 Gaillard, A., Kolb, K.E., Villani, A.C., Johannessen, C.M., Andreev, A.Y., Van Allen, E.M.,  
1367 Bertagnolli, M., Sorger, P.K., Sullivan, R.J., Flaherty, K.T., Frederick, D.T., Jane-Valbuena,  
1368 J., Yoon, C.H., Rozenblatt-Rosen, O., Shalek, A.K., Regev, A., Garraway, L.A., 2016.  
1369 Dissecting the multicellular ecosystem of metastatic melanoma by single-cell RNA-seq.  
1370 *Science* 352, 189-196.  
1371 Tsoi, J., Robert, L., Paraiso, K., Galvan, C., Sheu, K.M., Lay, J., Wong, D.J.L., Atefi, M.,  
1372 Shirazi, R., Wang, X., Braas, D., Grasso, C.S., Palaskas, N., Ribas, A., Graeber, T.G., 2018.  
1373 Multi-stage Differentiation Defines Melanoma Subtypes with Differential Vulnerability to  
1374 Drug-Induced Iron-Dependent Oxidative Stress. *Cancer Cell* 33, 890-904 e895.  
1375 Van Otterloo, E., Li, W., Bonde, G., Day, K.M., Hsu, M.Y., Cornell, R.A., 2010.  
1376 Differentiation of zebrafish melanophores depends on transcription factors AP2 alpha and  
1377 AP2 epsilon. *PLoS Genet* 6.  
1378 Van Otterloo, E., Li, W., Garnett, A., Cattell, M., Medeiros, D.M., Cornell, R.A., 2012.  
1379 Novel Tfp2-mediated control of soxE expression facilitated the evolutionary emergence of  
1380 the neural crest. *Development* 139, 720-730.  
1381 Verfaillie, A., Imrichova, H., Atak, Z.K., Dewaele, M., Rambow, F., Hulselmans, G.,  
1382 Christiaens, V., Svetlichnyy, D., Luciani, F., Van den Mooter, L., Claerhout, S., Fiers, M.,  
1383 Journe, F., Ghanem, G.E., Herrmann, C., Halder, G., Marine, J.C., Aerts, S., 2015. Decoding  
1384 the regulatory landscape of melanoma reveals TEADS as regulators of the invasive cell state.  
1385 *Nat Commun* 6, 6683.  
1386 Vierbuchen, T., Ling, E., Cowley, C.J., Couch, C.H., Wang, X., Harmin, D.A., Roberts,  
1387 C.W.M., Greenberg, M.E., 2017. AP-1 Transcription Factors and the BAF Complex Mediate  
1388 Signal-Dependent Enhancer Selection. *Mol Cell* 68, 1067-1082.e1012.  
1389 Voss, T.C., Hager, G.L., 2014. Dynamic regulation of transcriptional states by chromatin and  
1390 transcription factors. *Nat Rev Genet* 15, 69-81.  
1391 Wang, X., Bolotin, D., Chu, D.H., Polak, L., Williams, T., Fuchs, E., 2006. AP-2alpha: a  
1392 regulator of EGF receptor signaling and proliferation in skin epidermis. *J Cell Biol* 172, 409-  
1393 421.  
1394 Wang, X., Pasolli, H.A., Williams, T., Fuchs, E., 2008. AP-2 factors act in concert with  
1395 Notch to orchestrate terminal differentiation in skin epidermis. *J Cell Biol* 183, 37-48.  
1396 Watts, J.A., Zhang, C., Klein-Szanto, A.J., Kormish, J.D., Fu, J., Zhang, M.Q., Zaret, K.S.,  
1397 2011. Study of FoxA pioneer factor at silent genes reveals Rfx-repressed enhancer at Cdx2

1398 and a potential indicator of esophageal adenocarcinoma development. *PLoS Genet* 7,  
1399 e1002277.

1400 White, J.R., Thompson, D.T., Koch, K.E., Kiriazov, B.S., Beck, A.C., van der Heide, D.M.,  
1401 Grimm, B.G., Kulak, M.V., Weigel, R.J., 2021. AP-2alpha-mediated activation of E2F and  
1402 EZH2 drives melanoma metastasis. *Cancer Res*.

1403 Wilson, B.G., Wang, X., Shen, X., McKenna, E.S., Lemieux, M.E., Cho, Y.J., Koellhoffer,  
1404 E.C., Pomeroy, S.L., Orkin, S.H., Roberts, C.W., 2010. Epigenetic antagonism between  
1405 polycomb and SWI/SNF complexes during oncogenic transformation. *Cancer Cell* 18, 316-  
1406 328.

1407 Wong, P.P., Miranda, F., Chan, K.V., Berlato, C., Hurst, H.C., Scibetta, A.G., 2012. Histone  
1408 demethylase KDM5B collaborates with TFAP2C and Myc to repress the cell cycle inhibitor  
1409 p21(cip) (CDKN1A). *Mol Cell Biol* 32, 1633-1644.

1410 Yu, G., Wang, L.G., Han, Y., He, Q.Y., 2012. clusterProfiler: an R package for comparing  
1411 biological themes among gene clusters. *Omics* 16, 284-287.

1412 Zaret, K.S., 2020. Pioneer Transcription Factors Initiating Gene Network Changes. *Annu Rev*  
1413 *Genet* 54, 367-385.

1414 Zaret, K.S., Carroll, J.S., 2011. Pioneer transcription factors: establishing competence for  
1415 gene expression. *Genes Dev* 25, 2227-2241.

1416 Zhang, Y., Liu, T., Meyer, C.A., Eeckhoute, J., Johnson, D.S., Bernstein, B.E., Nusbaum, C.,  
1417 Myers, R.M., Brown, M., Li, W., Liu, X.S., 2008. Model-based analysis of ChIP-Seq  
1418 (MACS). *Genome Biol* 9, R137.

1419
